# Supplementary material
Source: PubMed Central journal article supplement (PMC2871065)
Supplement: NIHMS194665-supplement-1_si_001.pdf [file NIHMS194665-supplement-1_si_001.pdf]

## Supporting Information

### **An Oxidation of Benzyl Methyl Ethers with NBS that Selectively Affords Either Aromatic Aldehydes or Aromatic Methyl Esters**

Abdelrahman S. Mayhoub,<sup>§</sup> Arindam Talukdar, and Mark Cushman\*

*Department of Medicinal Chemistry and Molecular Pharmacology, School of Pharmacy and Pharmaceutical Sciences, and the Purdue Center for Cancer Research, Purdue University, West Lafayette, Indiana 47907*

*cushman@purdue.edu*

## Table of Contents

|                                                                                                 | Page |
|-------------------------------------------------------------------------------------------------|------|
| Scheme 1S                                                                                       | S3   |
| Scheme 2S                                                                                       | S3   |
| Scheme 3S                                                                                       | S3   |
| Experimental Section                                                                            | S3   |
| Methyl 2-(4-Chlorophenyl)-4-(methoxymethyl)thiazole-5-carboxylate ( <b>1j</b> )                 | S3   |
| 2-(4-Chlorophenyl)-4-(methoxymethyl)thiazole-5-carbonyl Chloride ( <b>21</b> )                  | S4   |
| 5-(2-(4-Chlorophenyl)-4-(methoxymethyl)thiazol-5-yl)-3-methyl-1,2,4-oxadiazole ( <b>1k</b> )    | S4   |
| 2-(4-Chlorophenyl)- <i>N,N</i> -diethyl-4-(methoxymethyl)thiazole-5-carboxamide ( <b>1l</b> )   | S5   |
| 2-(4-Chlorophenyl)-5-(3-methyl-1,2,4-oxadiazol-5-yl)thiazole-4-carbaldehyde ( <b>2h</b> )       | S5   |
| Methyl 2-(4-Chlorophenyl)-5-(3-methyl-1,2,4-oxadiazol-5-yl)thiazole-4-carboxylate ( <b>3j</b> ) | S5   |
| 2-(4-Chlorophenyl)- <i>N,N</i> -diethyl-4-formylthiazole-5-carboxamide ( <b>2i</b> )            | S5   |
| Methyl 2-(4-Chlorophenyl)-5-(diethylcarbamoyl)thiazole-4-carboxylate ( <b>3k</b> )              | S5   |
| <sup>13</sup> C NMR spectrum of compound <b>1j</b>                                              | S7   |
| <sup>1</sup> H NMR spectrum of compound <b>1j</b>                                               | S8   |
| <sup>1</sup> H NMR spectrum of compound <b>2g</b>                                               | S9   |
| <sup>13</sup> C NMR spectrum of compound <b>2g</b>                                              | S10  |
| <sup>13</sup> C NMR spectrum of compound <b>3i</b>                                              | S11  |
| <sup>13</sup> C NMR spectrum of compound <b>3i</b>                                              | S12  |
| <sup>1</sup> H NMR spectrum of compound <b>1k</b>                                               | S13  |
| <sup>13</sup> C NMR spectrum of compound <b>1k</b>                                              | S14  |
| <sup>1</sup> H NMR spectrum of compound <b>2h</b>                                               | S15  |
| <sup>13</sup> C NMR spectrum of compound <b>2h</b>                                              | S16  |
| <sup>1</sup> H NMR spectrum of compound <b>3j</b>                                               | S17  |
| <sup>13</sup> C NMR spectrum of compound <b>3j</b>                                              | S18  |
| <sup>1</sup> H NMR spectrum of compound <b>1l</b>                                               | S19  |
| <sup>13</sup> C NMR spectrum of compound <b>1l</b>                                              | S20  |
| <sup>13</sup> C NMR spectrum of compound <b>2i</b>                                              | S21  |
| <sup>1</sup> H NMR spectrum of compound <b>2i</b>                                               | S22  |
| <sup>13</sup> C NMR spectrum of compound <b>3k</b>                                              | S23  |
| <sup>1</sup> H NMR spectrum of compound <b>3k</b>                                               | S24  |
| <sup>1</sup> H NMR spectrum of compound <b>21</b>                                               | S25  |
| <sup>13</sup> C NMR spectrum of compound <b>21</b>                                              | S26  |
| HPLC Chart of compound <b>2h</b>                                                                | S27  |
| HPLC Chart of compound <b>3k</b>                                                                | S28  |
| <sup>1</sup> H NMR spectrum of compound <b>1h</b>                                               | S29  |
| <sup>1</sup> H NMR spectrum of compound <b>3g</b>                                               | S30  |
| <sup>13</sup> C NMR spectrum of compound <b>3g</b>                                              | S31  |
| <sup>1</sup> H NMR spectrum of compound <b>3f</b>                                               | S32  |
| <sup>1</sup> H NMR spectrum of compound <b>3e</b>                                               | S33  |
| <sup>1</sup> H NMR spectrum of entry 5                                                          | S34  |
| <sup>1</sup> H NMR spectrum of compound <b>2b</b>                                               | S35  |
| <sup>1</sup> H NMR spectrum of compound <b>3b</b>                                               | S36  |
| <sup>1</sup> H NMR spectrum of compound <b>1f</b>                                               | S37  |
| <sup>1</sup> H NMR spectrum of compound <b>2e</b>                                               | S38  |
| <sup>1</sup> H NMR spectrum of compound <b>3a</b>                                               | S39  |
| <sup>1</sup> H NMR spectrum of compound <b>1d</b>                                               | S40  |
| <sup>1</sup> H NMR spectrum of compound <b>3d</b>                                               | S41  |
| <sup>1</sup> H NMR spectrum of compound <b>2f</b>                                               | S42  |
| <sup>1</sup> H NMR spectrum of compound <b>3h</b>                                               | S43  |

## Preparation of Phenylthiazole Derivatives

### Scheme 1S

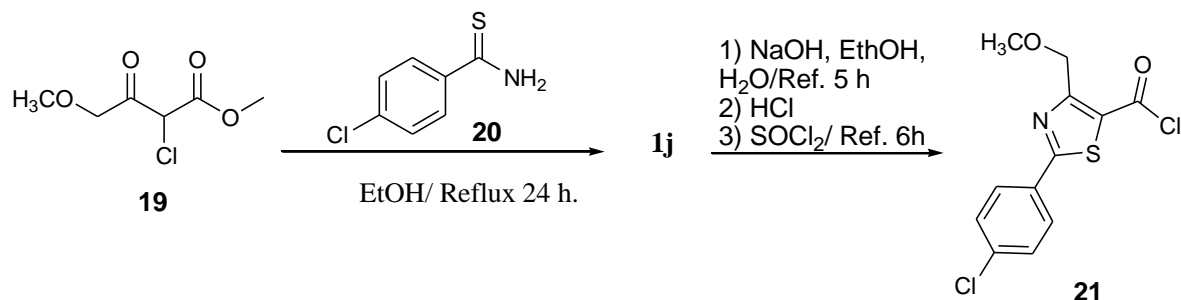

### Scheme 2S

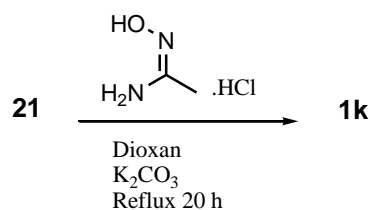

### Scheme 3S

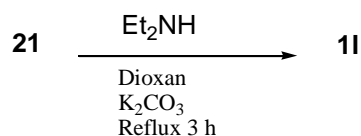

## Experimental

**General,** <sup>1</sup>H NMR spectra were determined at 300 MHz and <sup>13</sup>C spectra were obtained at 75.46 MHz in deuterated chloroform (CDCl<sub>3</sub>). Chemical shifts are given in parts per million (ppm) on the delta (δ) scale. Chemical shifts were related to that of the solvent. Mass spectra were recorded at 70 eV. Ethers **1a-c** and **1e** are commercially available. Other known, non-commercially available, benzyl ether derivatives were prepared from the corresponding bromomethyl analogues using Williamson's method. NMR data and comparison with authentic commercial samples confirmed the structures and purities of compounds **2a-f** and **3a-h**. The full scheme for preparation of phenylthiazoles **1j-l** and their antiviral activity will publish separately.

**Methyl 2-(4-Chlorophenyl)-4-(methoxymethyl)thiazole-5-carboxylate (1j).** 4-Chloro-thiobenzamide (**20**, 3.420 g, 20 mmol) and α-chlorodiketo derivative **19** (5.00 g, 27.7 mmol) were added to absolute ethanol (50 mL). The reaction mixture was heated to reflux for 24 h. After removal of solvent under reduced pressure, the residue was

purified by silica gel chromatography (hexanes-ethyl acetate 3:2) to provide the desired compound as an off-white solid (43.420 g, 74.4 %): mp 100-101 °C. <sup>1</sup>H NMR (CDCl<sub>3</sub>) δ 7.82 (d, *J* = 7 Hz, 2 H), 7.31 (d, *J* = 7 Hz, 2 H), 4.84 (s, 2 H), 3.82 (s, 3 H), 3.45 (s, 3 H); <sup>13</sup>C NMR (CDCl<sub>3</sub>) δ 169.2, 161.4, 160.0, 137.1, 130.9, 129.0, 128.0, 124.0, 67.9, 58.8, 52.3; MS (*m/z*, rel intensity) 300 (MH<sup>+</sup>, 18), 298 (MH<sup>+</sup>, 60); HRMS (EI), *m/z* M<sup>+</sup> 297.0227 calcd for C<sub>13</sub>H<sub>12</sub>ClNO<sub>3</sub>S 297.0226.

**2-(4-Chlorophenyl)-4-(methoxymethyl)thiazole-5-carbonyl Chloride (21).** NaOH (4.00 g, 100 mmol) was added to a solution of methyl ester **1j** (6.237 g, 21 mmol) in ethanol (40 mL) and water (5 mL). The reaction mixture was heated under reflux for 5 h, and then allowed to cool to room temperature. The reaction mixture was filtered and the pH of the liquid phase was adjusted to 2 with hydrochloride acid. The solid was filtered and dried to provide 2-(4-chlorophenyl)-4-(methoxymethyl)thiazole-5-carboxylic acid as a white solid (4.98 g, 83.7 %): mp 197-199 °C (dec.). <sup>1</sup>H NMR (DMSO) δ 3.33 (s, 3 H), 4.76 (s, 2 H), 5.8 (brs, 1 H), 7.50 (d, *J* = 7.5 Hz, 2 H), 7.91, (d, *J* = 7.5 Hz, 2 H); <sup>13</sup>C NMR (DMSO) δ 168.4, 163.0, 159.6, 136.8, 131.8, 130.2, 129.0, 127.4, 67.7, 58.8; MS (*m/z*, rel intensity) 286 (MH<sup>+</sup>, 39), 284 (MH<sup>+</sup>, 100). The crude carboxylic acid derivative (4.88 g, 17.24 mmol) was heated under reflux with thionyl chloride (25 mL) for 6 h. The solvent was evaporated under reduced pressure. The brown residue was collected and purified by silica gel flash chromatography, using hexane: ethyl acetate (7:3), to yield a brownish white solid (2.507 g, 96 %): mp 91 °C. IR (film) 2976, 1742, 1593 cm<sup>-1</sup>; <sup>1</sup>H NMR (CDCl<sub>3</sub>) δ 7.96 (d, *J* = 7.2 Hz, 2 H), 7.43 (d, *J* = 7.2 Hz, 2 H), 4.80 (s, 2 H), 3.52 (s, 3 H); <sup>13</sup>C NMR (CDCl<sub>3</sub>) δ 172.9, 162.7, 157.6, 138.2, 130.3, 129.4, 128.3, 68.7, 59.3; MS (*m/z*, rel intensity) 308 (MH<sup>+</sup>, 18), 306 (MH<sup>+</sup>, 31), 304 (MH<sup>+</sup>, 12), 302 (MH<sup>+</sup>, 17); HRMS (CI), *m/z* M<sup>+</sup> 301.9806, calcd for C<sub>12</sub>H<sub>9</sub>Cl<sub>2</sub>NO<sub>2</sub>S 301.9809.

**5-(2-(4-Chlorophenyl)-4-(methoxymethyl)thiazol-5-yl)-3-methyl-1,2,4-oxadiazole (1k).** Acetamide oxime hydrochloride (49 mg, 0.66 mmol) and potassium carbonate (91 mg, 0.66 mmol) were added to a stirred solution of the acid chloride **21** (100 mg, 0.33 mmol) in dioxane (5 mL). The reaction mixture was heated under reflux for 20 h. The solvent was taken off under reduced pressure and the solid residue was partitioned between ethyl acetate (10 mL) and water (10 mL). The organic layer was separated and dried over anhydrous magnesium sulfate. The obtained solid product was purified by silica gel flash chromatography using hexane: ethyl acetate (9:1) to afford a yellowish-white solid (99 mg, 93 %): mp 89 °C. <sup>1</sup>H NMR (CDCl<sub>3</sub>) δ 2.45 (s, 3 H), 3.53 (s, 3 H), 4.96 (s, 2 H), 7.42 (d, *J* = 7.5 Hz, 2 H), 7.93 (d, *J* = 7.5 Hz, 2 H); <sup>13</sup>C NMR (CDCl<sub>3</sub>) δ 169.6, 169.2, 167.6, 157.6, 137.4, 130.6,

129.2, 128.1, 118.0, 68.0, 59.0, 11.5; MS ( $m/z$ , rel intensity) 324 ( $MH^+$ , 14.4), 322 ( $MH^+$ , 41.5), 292 (39), 294 (100); HRMS (ESI),  $m/z$   $MH^+$  322.0417 calcd for  $C_{14}H_{13}ClN_3O_2S$  322.0415.

**2-(4-Chlorophenyl)-*N,N*-diethyl-4-(methoxymethyl)thiazole-5-carboxamide (1l).** Diethylamine (29 mg, 0.66 mmol) and potassium carbonate (91 mg, 0.66 mmol) were added to a stirred solution of the acid chloride **21** (100 mg, 0.33 mmol) in dioxane (5 mL). The reaction mixture was heated under reflux for 3 h. The solvent was taken off under reduced pressure and the solid residue was partitioned between ethyl acetate (10 mL) and water (10 mL). The organic layer was separated and dried over anhydrous magnesium sulfate. The obtained solid product was purified by crystallization from ethanol to afford the titled compound as colorless crystals (90 %): mp 112-113 °C.  $^1H$  NMR ( $CDCl_3$ )  $\delta$  7.86 (d,  $J$  = 8.7 Hz, 2 H), 7.40 (d,  $J$  = 8.7 Hz, 2 H), 4.57 (s, 2 H), 3.45 (s, 7 H), 1.20 (s, 6 H);  $^{13}C$  NMR ( $CDCl_3$ )  $\delta$  165.9, 162.0, 151.9, 136.4, 131.2, 129.1, 127.8, 68.7, 58.8, 43.2, 39.7, 12.7; MS ( $m/z$ , rel intensity) 363 ( $MNa^+$ , 12), 361 ( $MNa^+$ , 26.8), 309 ( $M^+$ - Et, 39), 307 ( $M^+$ - Et, 100); HRMS (ESI),  $m/z$   $MNa^+$  361.0753 calcd for  $C_{16}H_{19}ClN_2O_2SNa$  361.0755.

**2-(4-Chlorophenyl)-5-(3-methyl-1,2,4-oxadiazol-5-yl)thiazole-4-carbaldehyde (2h).** White solid (55%): mp 153-155 °C.  $^1H$  NMR ( $CDCl_3$ )  $\delta$  10.69 (s, 1 H), 8.00 (d,  $J$  = 8.4 Hz, 2 H), 7.47 (d,  $J$  = 8.4 Hz, 2 H), 2.52 (s, 3 H);  $^{13}C$  NMR ( $CDCl_3$ )  $\delta$  183.3, 170.1, 168.3, 153.7, 138.4, 129.8, 129.5, 128.5, 11.5; MS ( $m/z$ , rel intensity) 307 ( $M^+$ , 34), 305 ( $M^+$ , 100); HRMS (ESI),  $m/z$   $MH^+$  305.0027 calcd for  $C_{13}H_8ClN_3O_2S$  305.0025; HPLC (98.75 %).

**Methyl 2-(4-Chlorophenyl)-5-(3-methyl-1,2,4-oxadiazol-5-yl)thiazole-4-carboxylate (3j).** White solid (71%): mp 119-120 °C.  $^1H$  NMR ( $CDCl_3$ )  $\delta$  7.95 (d,  $J$  = 8.4 Hz, 2 H), 7.46 (d,  $J$  = 8.4 Hz, 2 H), 4.01 (s, 2 H), 2.49 (s, 3 H);  $^{13}C$  NMR ( $CDCl_3$ )  $\delta$  169.6, 167.8, 163.2, 159.3, 147.8, 138.0, 130.0, 129.4, 128.2, 118.2, 53.1, 11.5; HRMS (ESI),  $m/z$  ( $M^+$ - $OCH_3$ ) 303.9947, calcd for  $C_{13}H_7ClN_3O_2S$  303.9948.

**2-(4-Chlorophenyl)-*N,N*-diethyl-4-formylthiazole-5-carboxamide (2i).** Colorless solid (57 %): mp 145-147 °C.  $^1H$  NMR ( $CDCl_3$ )  $\delta$  10.09 (s, 1 H), 7.91 (d,  $J$  = 8.4 Hz, 2 H), 7.46 (d,  $J$  = 8.4 Hz, 2 H), 3.61 (q,  $J$  = 6.0 Hz, 2 H), 3.28 (q,  $J$  = 6.0 Hz, 2 H), 1.32 (t,  $J$  = 6.0 Hz, 3 H), 1.12 (t,  $J$  = 6.0 Hz, 3 H);  $^{13}C$  NMR ( $CDCl_3$ )  $\delta$  184.2, 166.5, 160.3, 150.0, 138.4, 137.3, 130.3, 129.4, 128.0, 43.2, 39.8, 13.9, 12.3; HRMS (ESI),  $m/z$   $MNa^+$  345.0443, calcd for  $C_{15}H_{15}ClN_2O_2SNa$  345.0440.

**Methyl 2-(4-Chlorophenyl)-5-(diethylcarbamoyl)thiazole-4-carboxylate (3k).** Colorless solid (65 %): mp 85-86 °C.  $^1H$  NMR ( $CDCl_3$ )  $\delta$  7.90 (d,  $J$  = 8.7 Hz, 2 H), 7.44 (d,  $J$  = 8.7 Hz, 2 H), 3.93 (s, 3 H), 3.58 (q,  $J$  = 6.0 Hz, 2 H), 3.43 (q,  $J$  = 6.0 Hz, 2 H), 1.32 (t,  $J$  = 6.0 Hz, 3 H), 1.11 (t,  $J$  = 6.0 Hz, 3 H);  $^{13}C$  NMR ( $CDCl_3$ )  $\delta$  165.9,

161.1, 160.9, 137.2, 130.5, 129.3, 129.1, 128.1, 127.9, 52.6, 43.2, 39.65, 29.6; HRMS (ESI),  $m/z$   $MNa^+$  375.0545, calcd for  $C_{16}H_{17}ClN_2O_3SNa$  375.0546; HPLC (96.38 %).

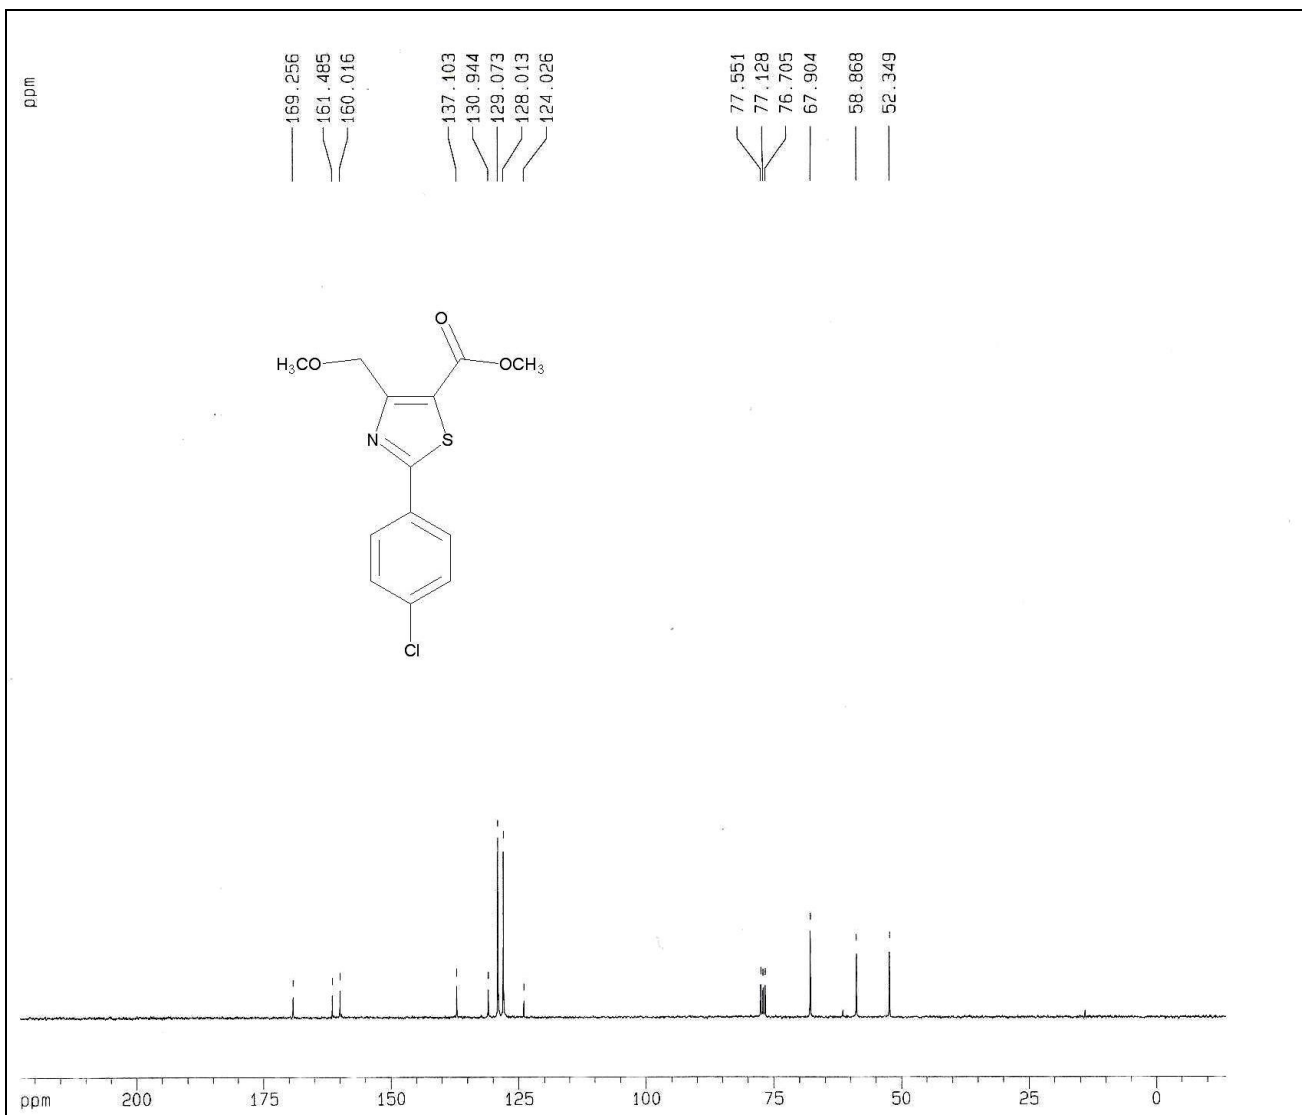

<sup>13</sup>C NMR spectrum of compound **1j**.

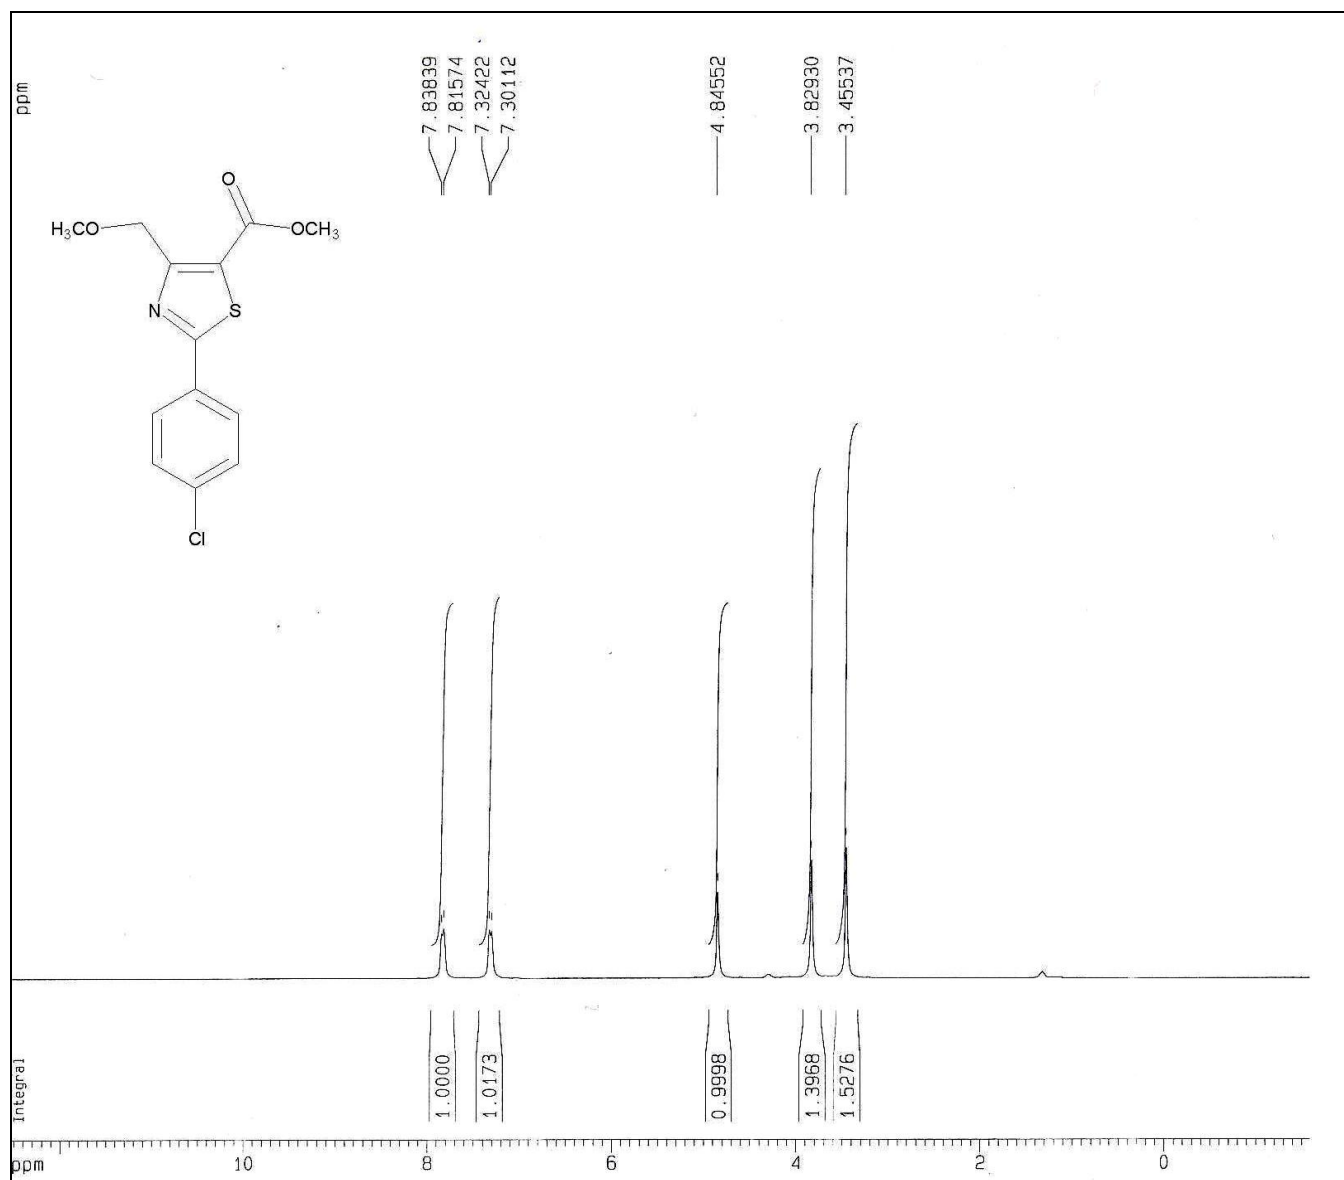

<sup>1</sup>H NMR spectrum of compound **1j**.



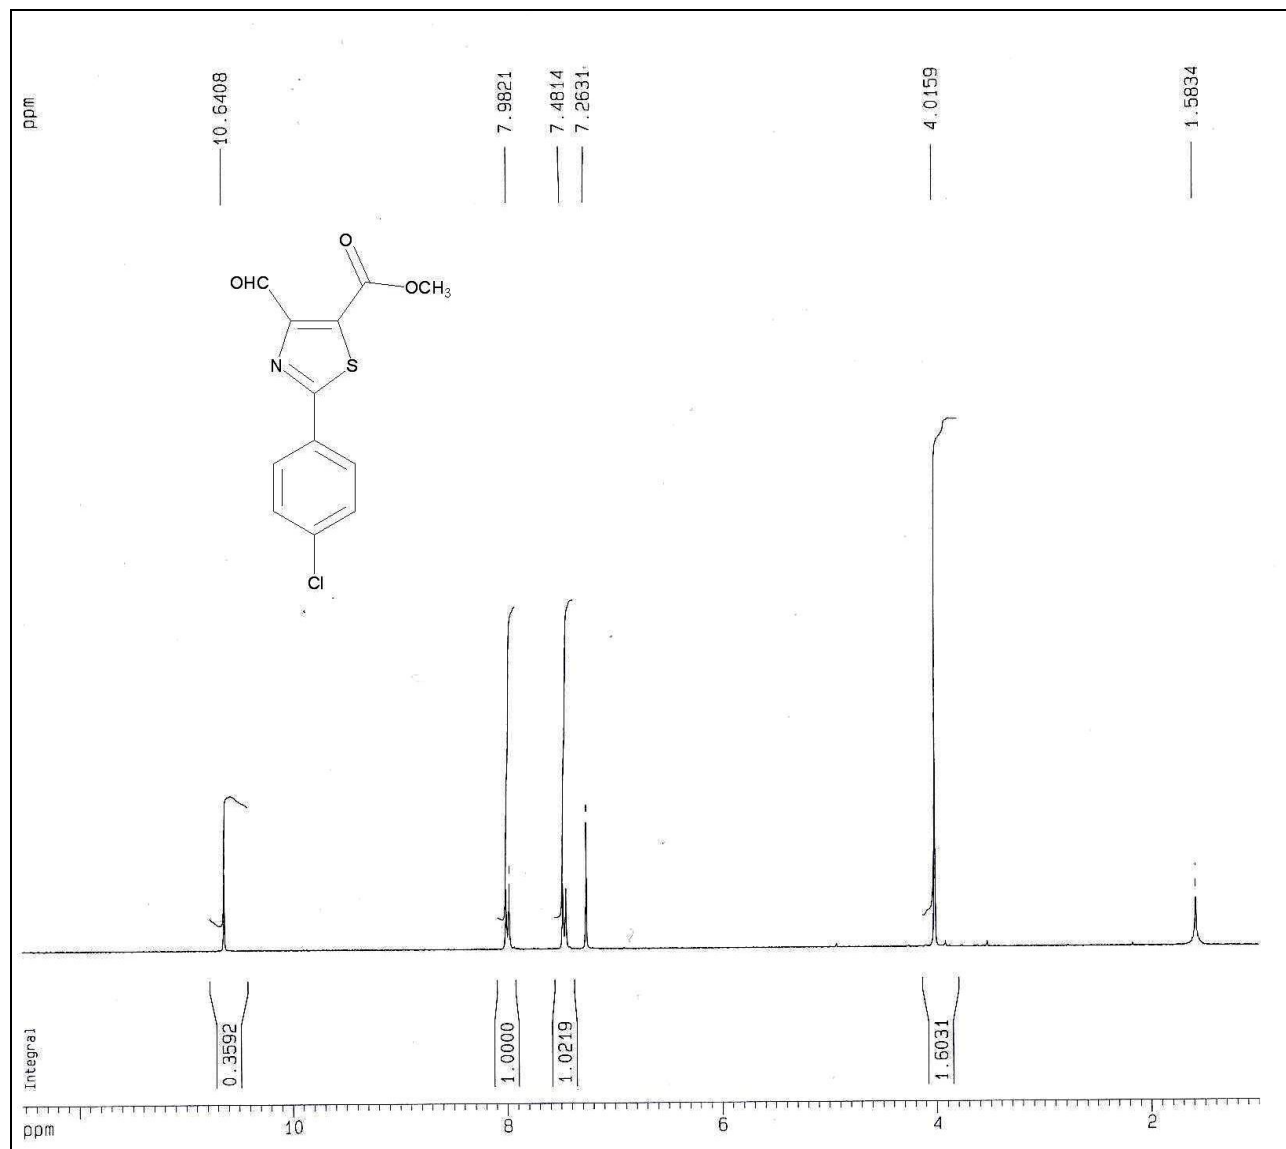

<sup>1</sup>H NMR spectrum of compound **2g**.

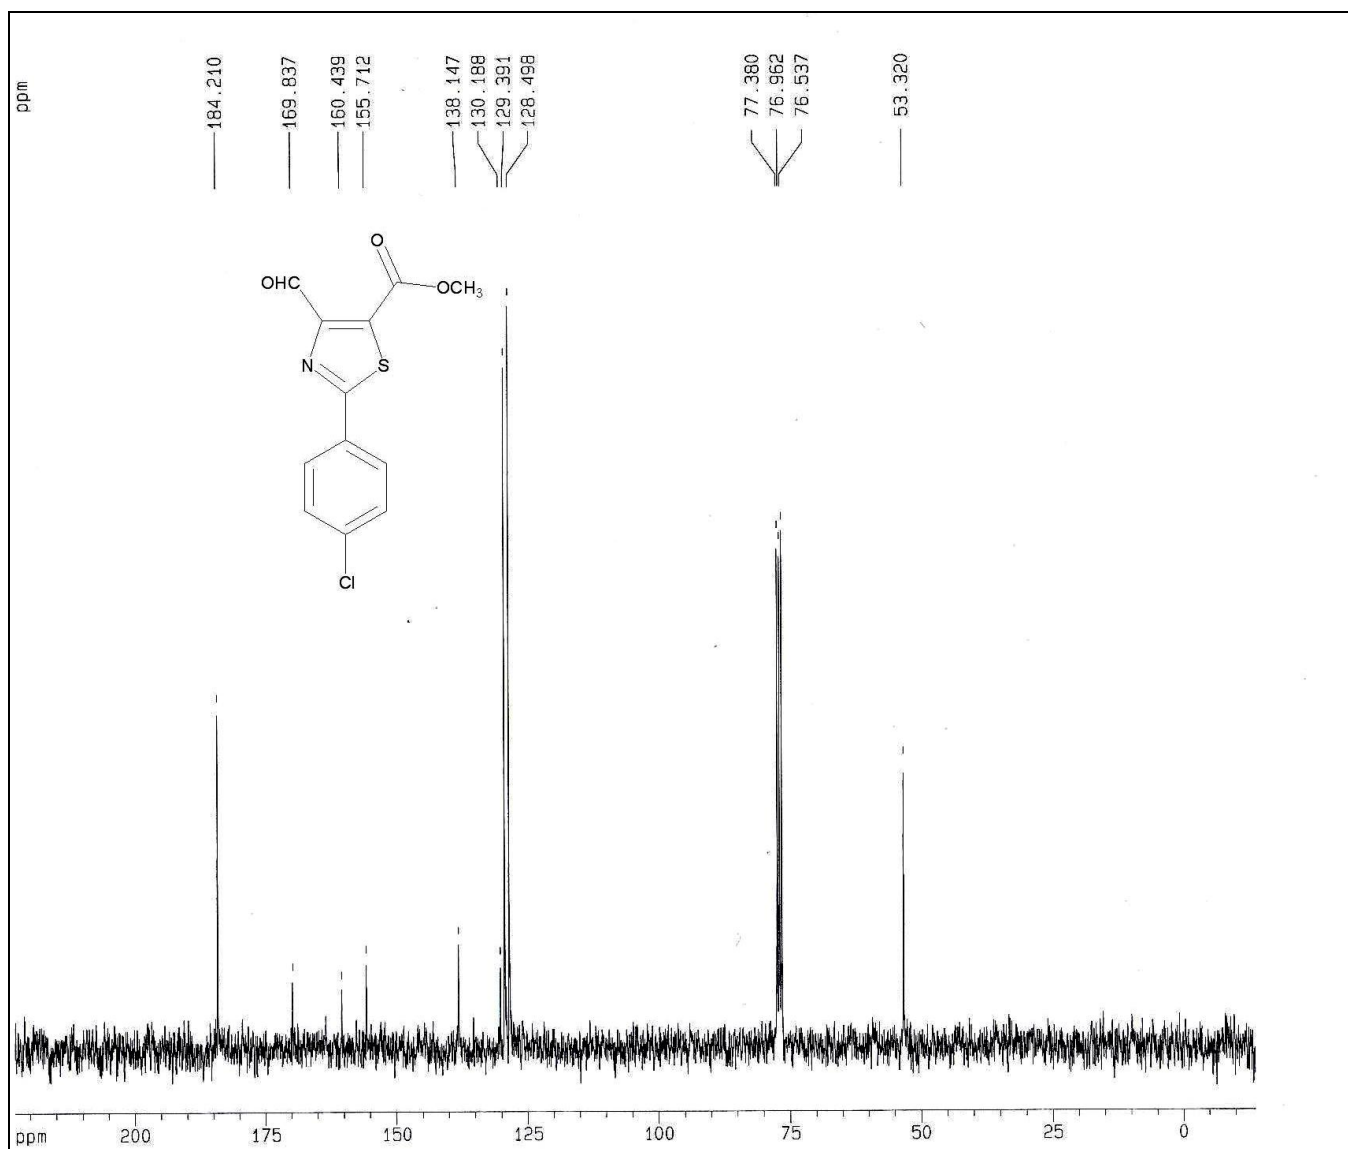

$^{13}\text{C}$  NMR spectrum of compound **2g**.

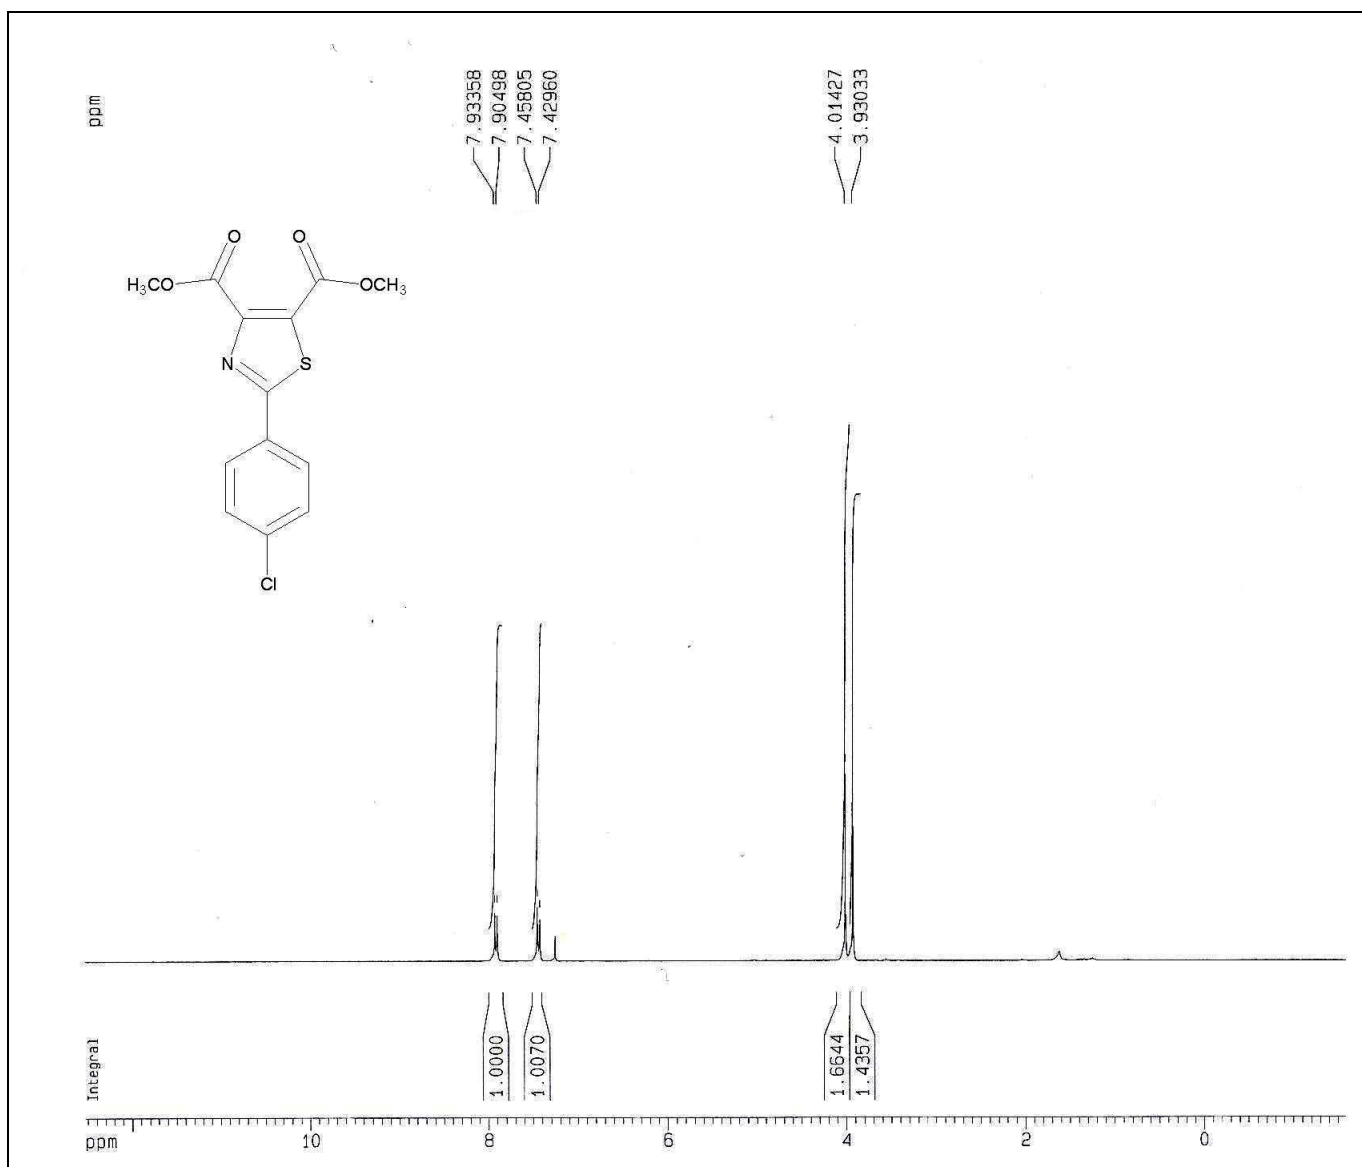

<sup>1</sup>H NMR spectrum of compound **3i**.

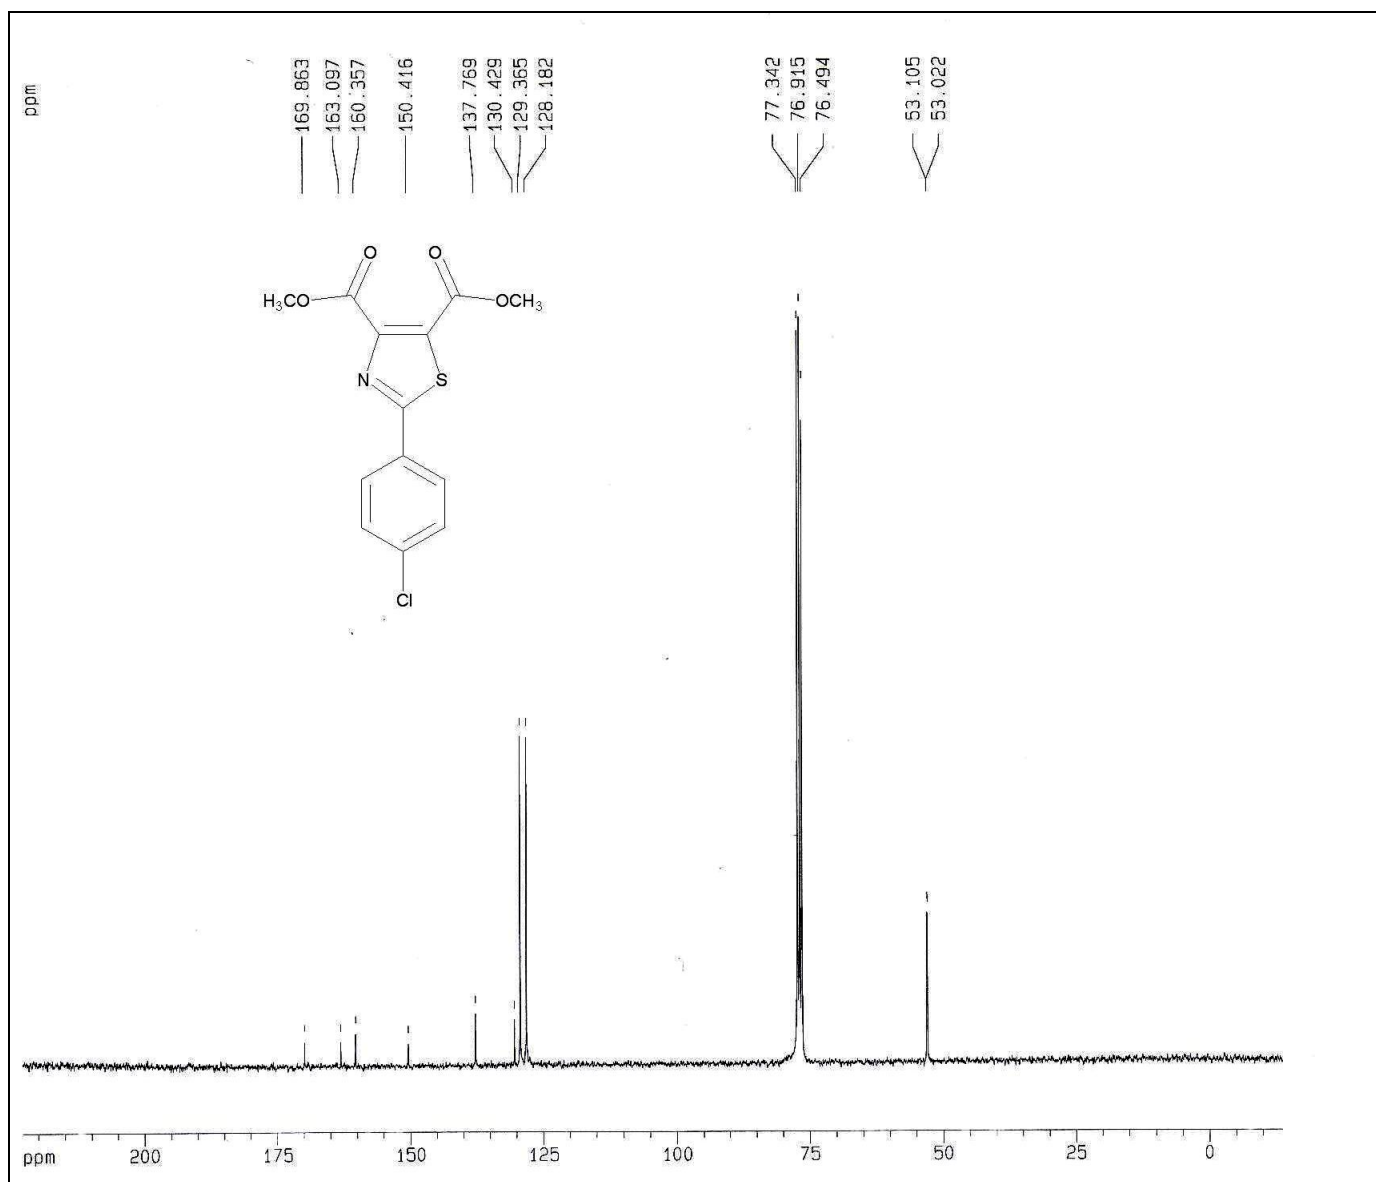

<sup>13</sup>C NMR spectrum of compound **3i**.

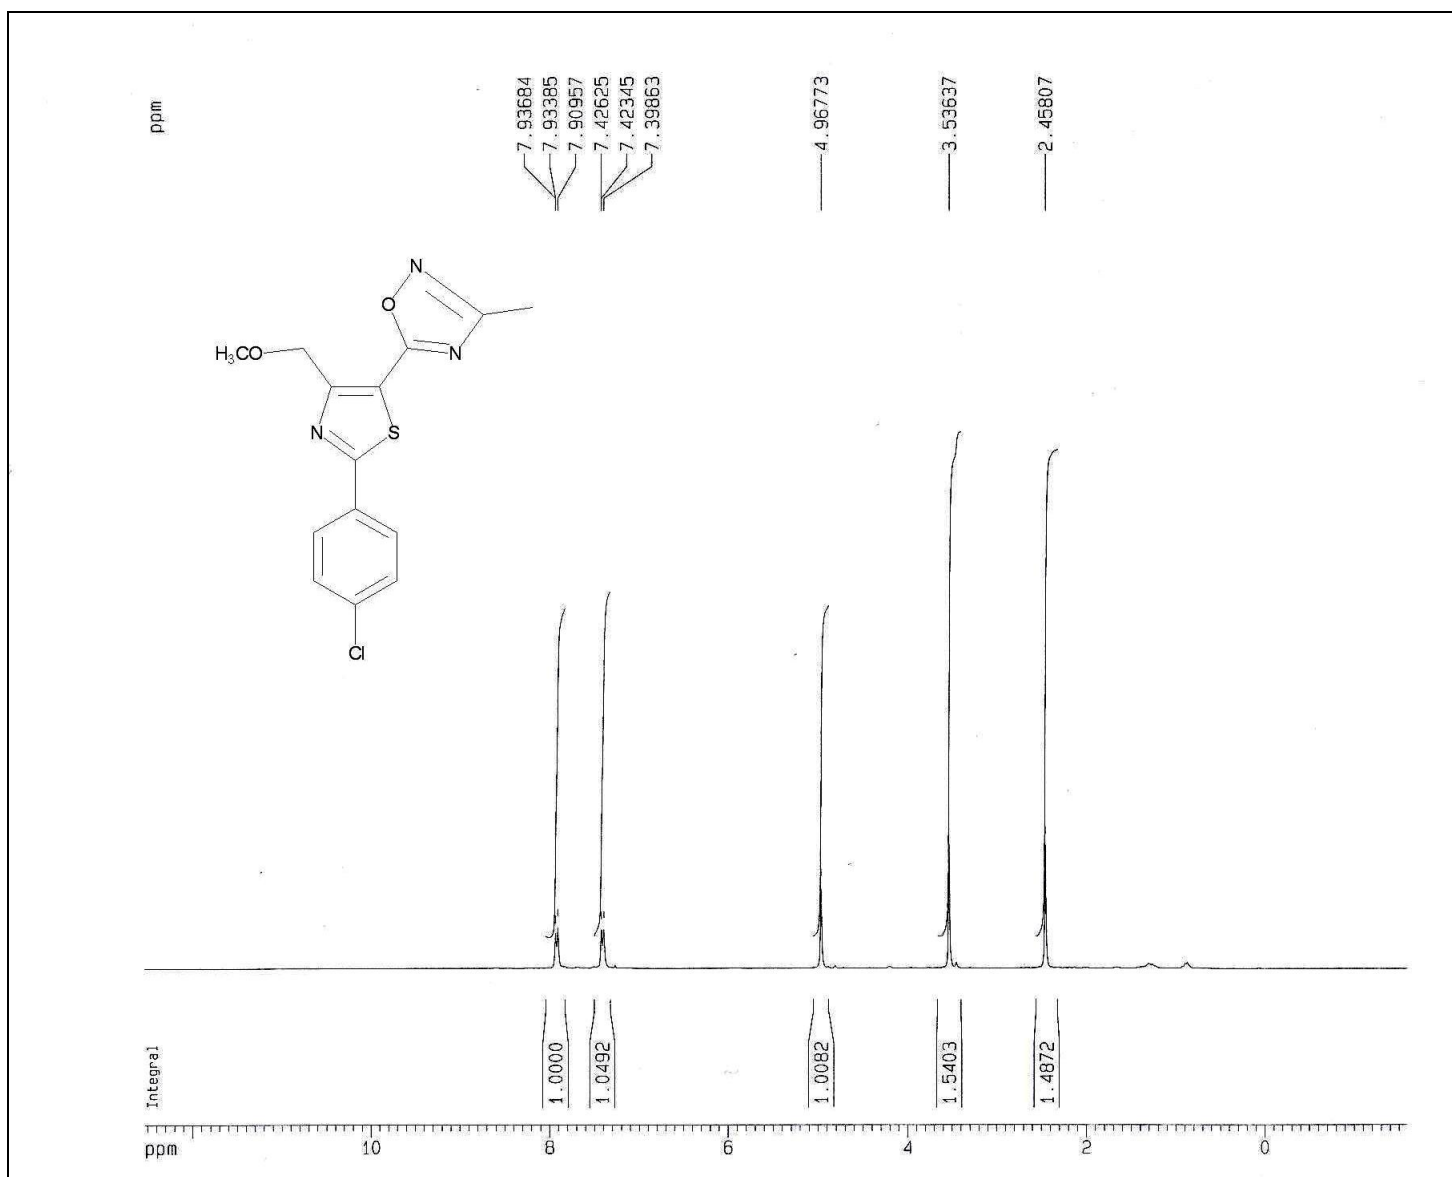

<sup>1</sup>H NMR spectrum of compound **1k**.

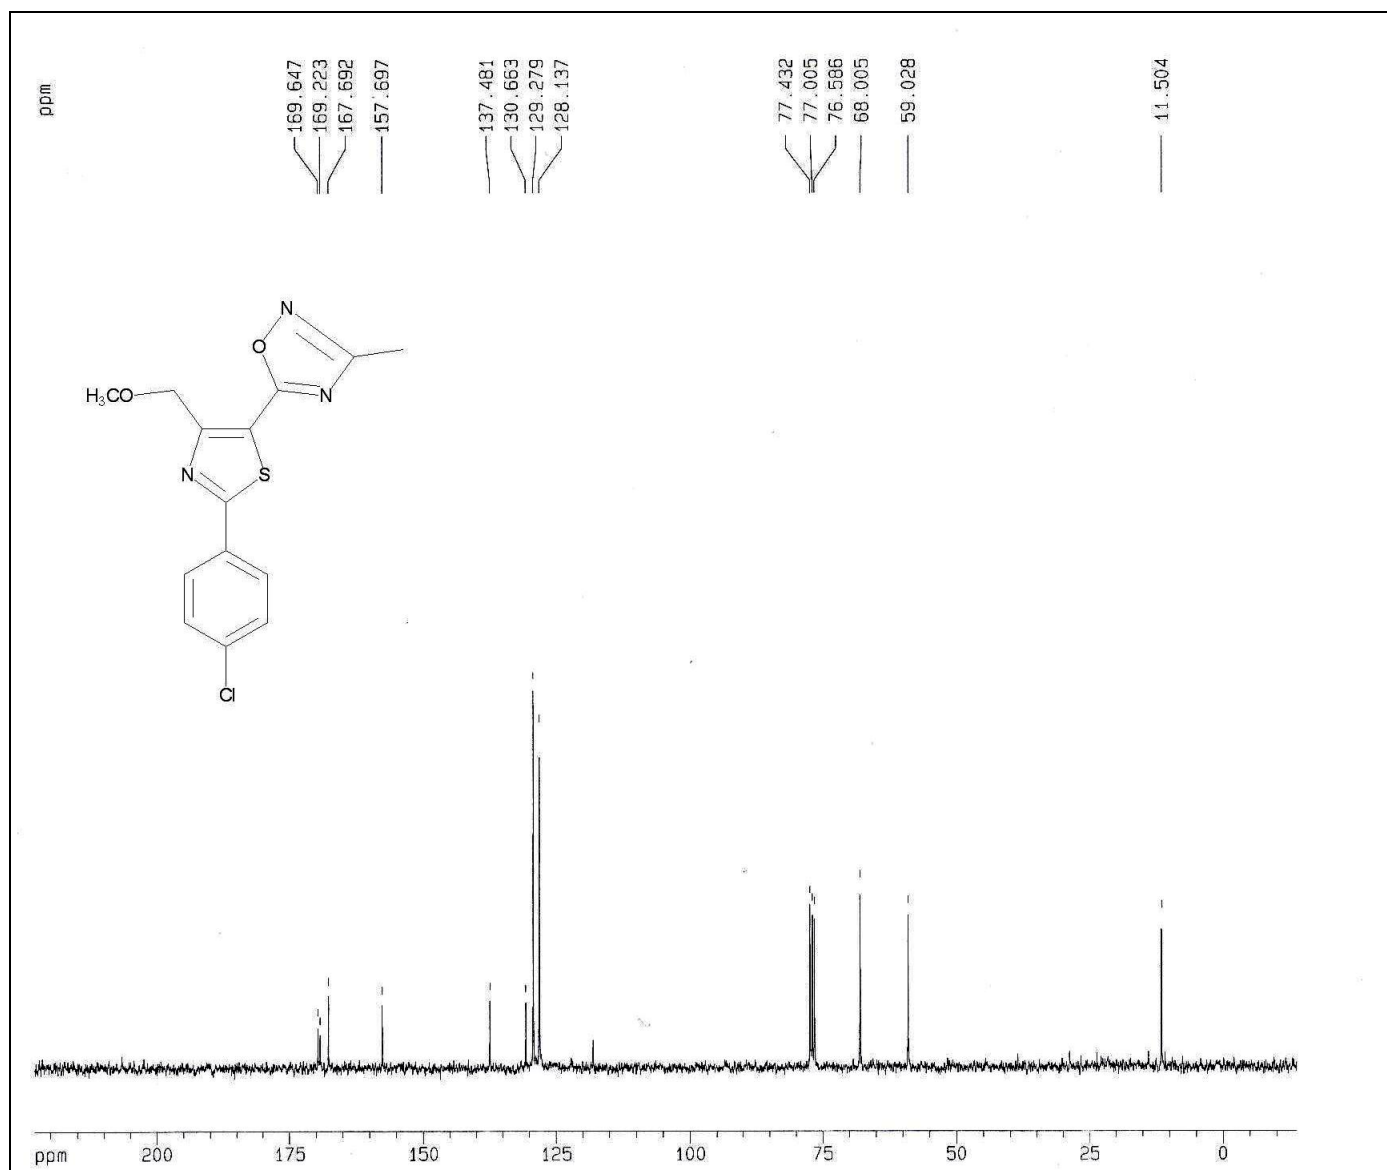

<sup>13</sup>C NMR spectrum of compound **1k**.

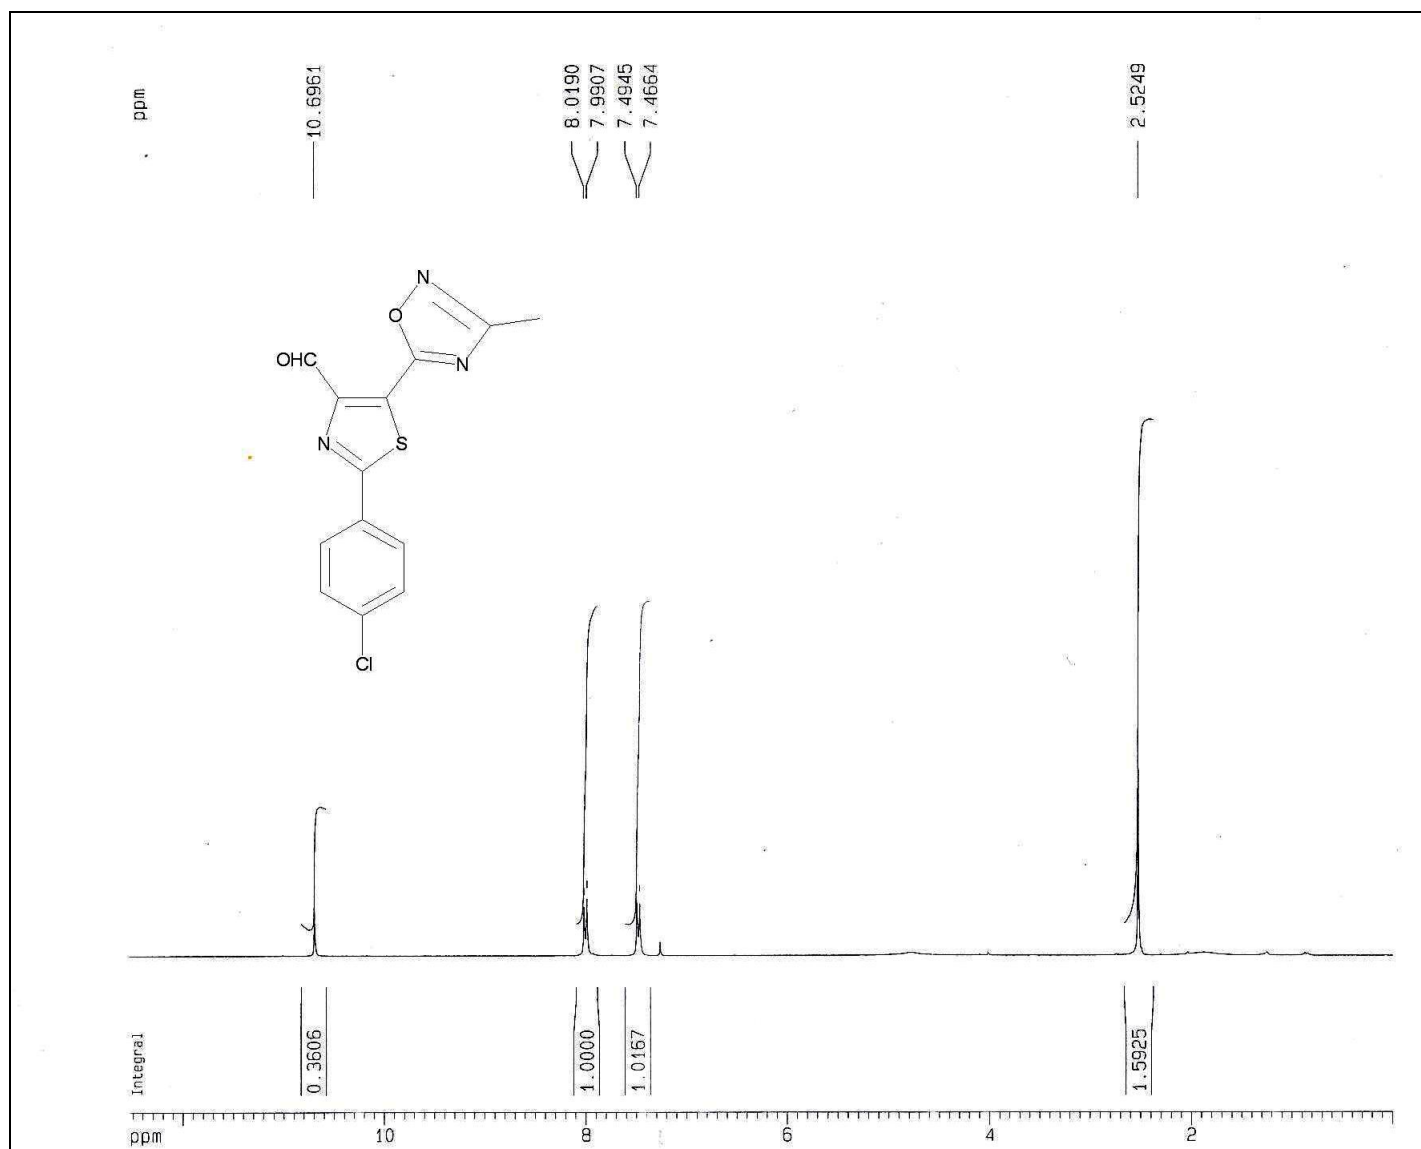

<sup>1</sup>H NMR spectrum of compound **2h**.

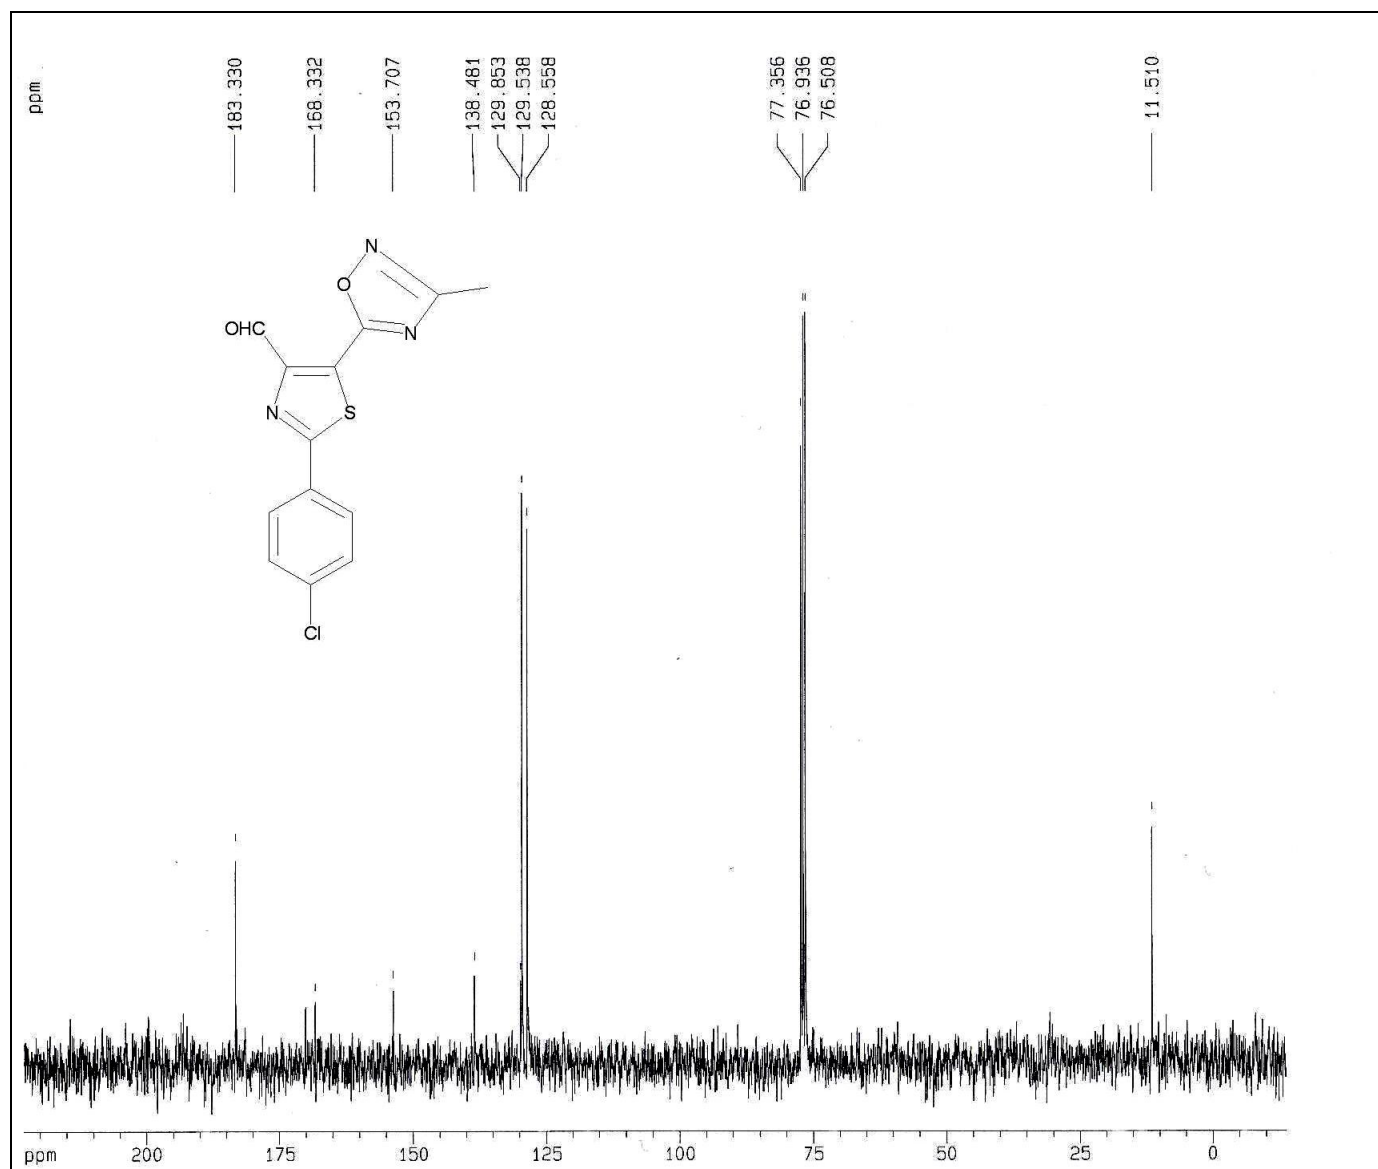

<sup>13</sup>C NMR spectrum of compound **2h**.



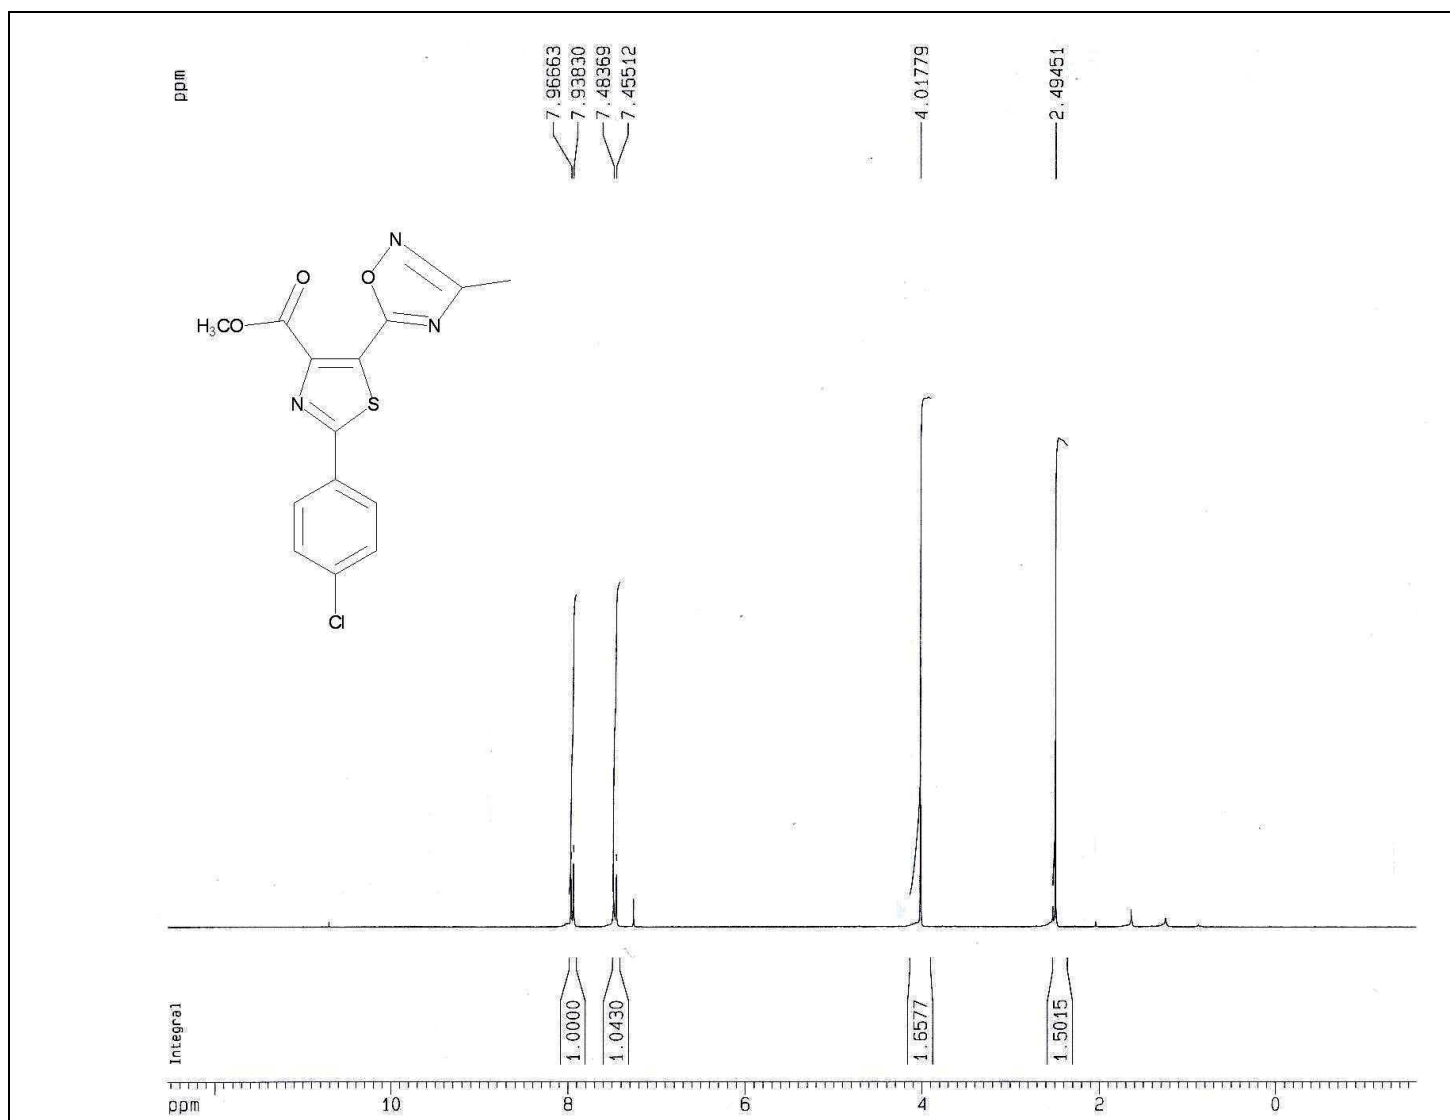

<sup>1</sup>H NMR spectrum of compound **3j**.

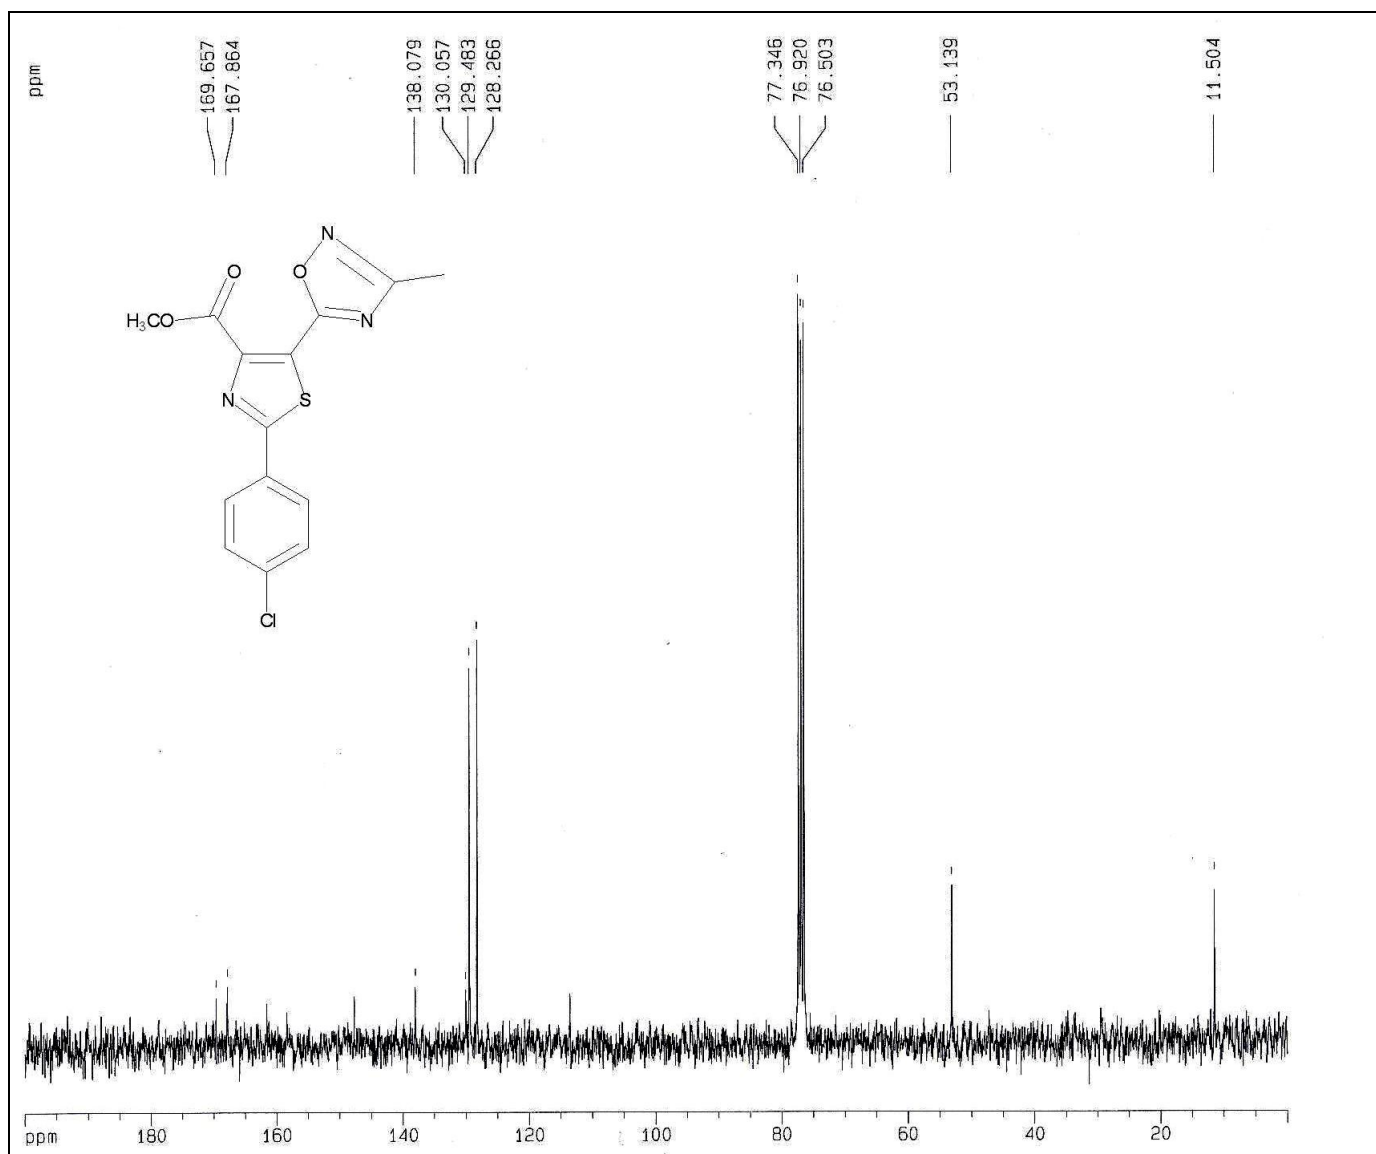

<sup>13</sup>C NMR spectrum of compound **3j**.

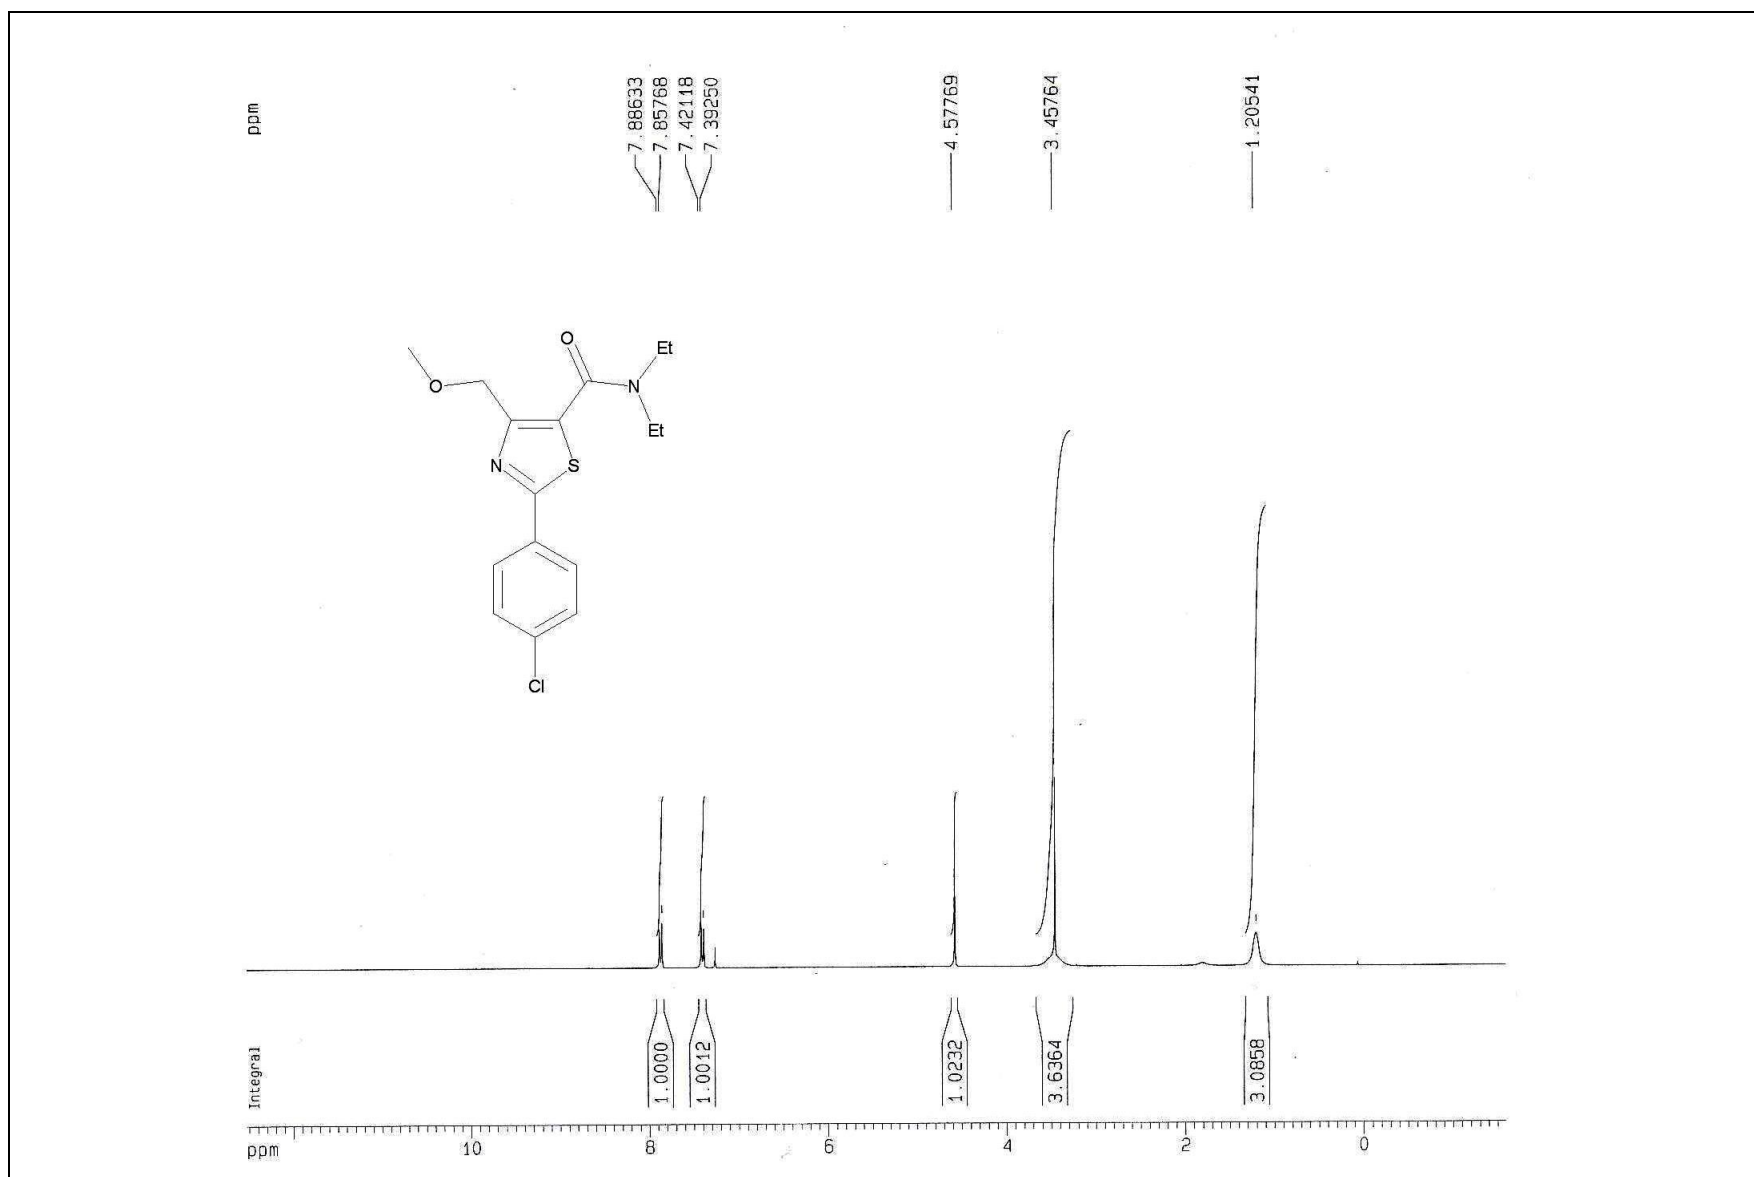

<sup>1</sup>H NMR spectrum of compound **11**.

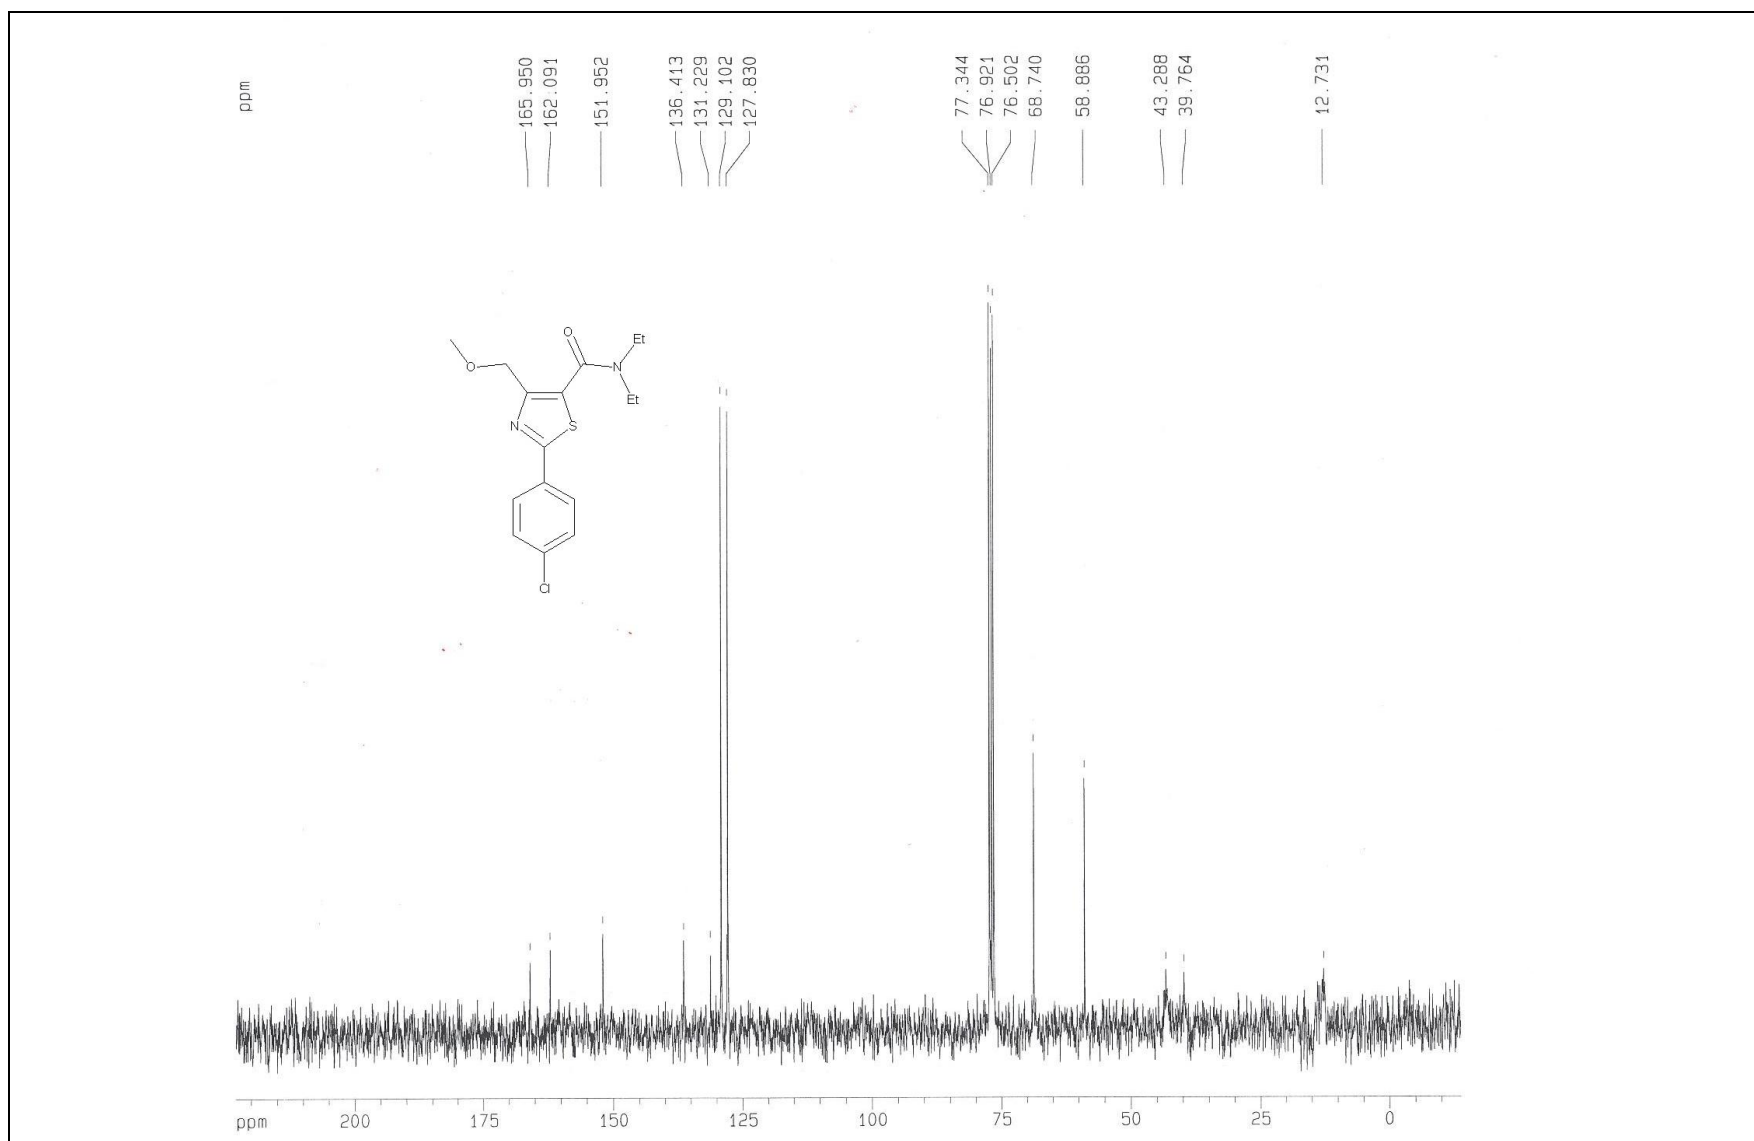

<sup>13</sup>C NMR spectrum of compound II.

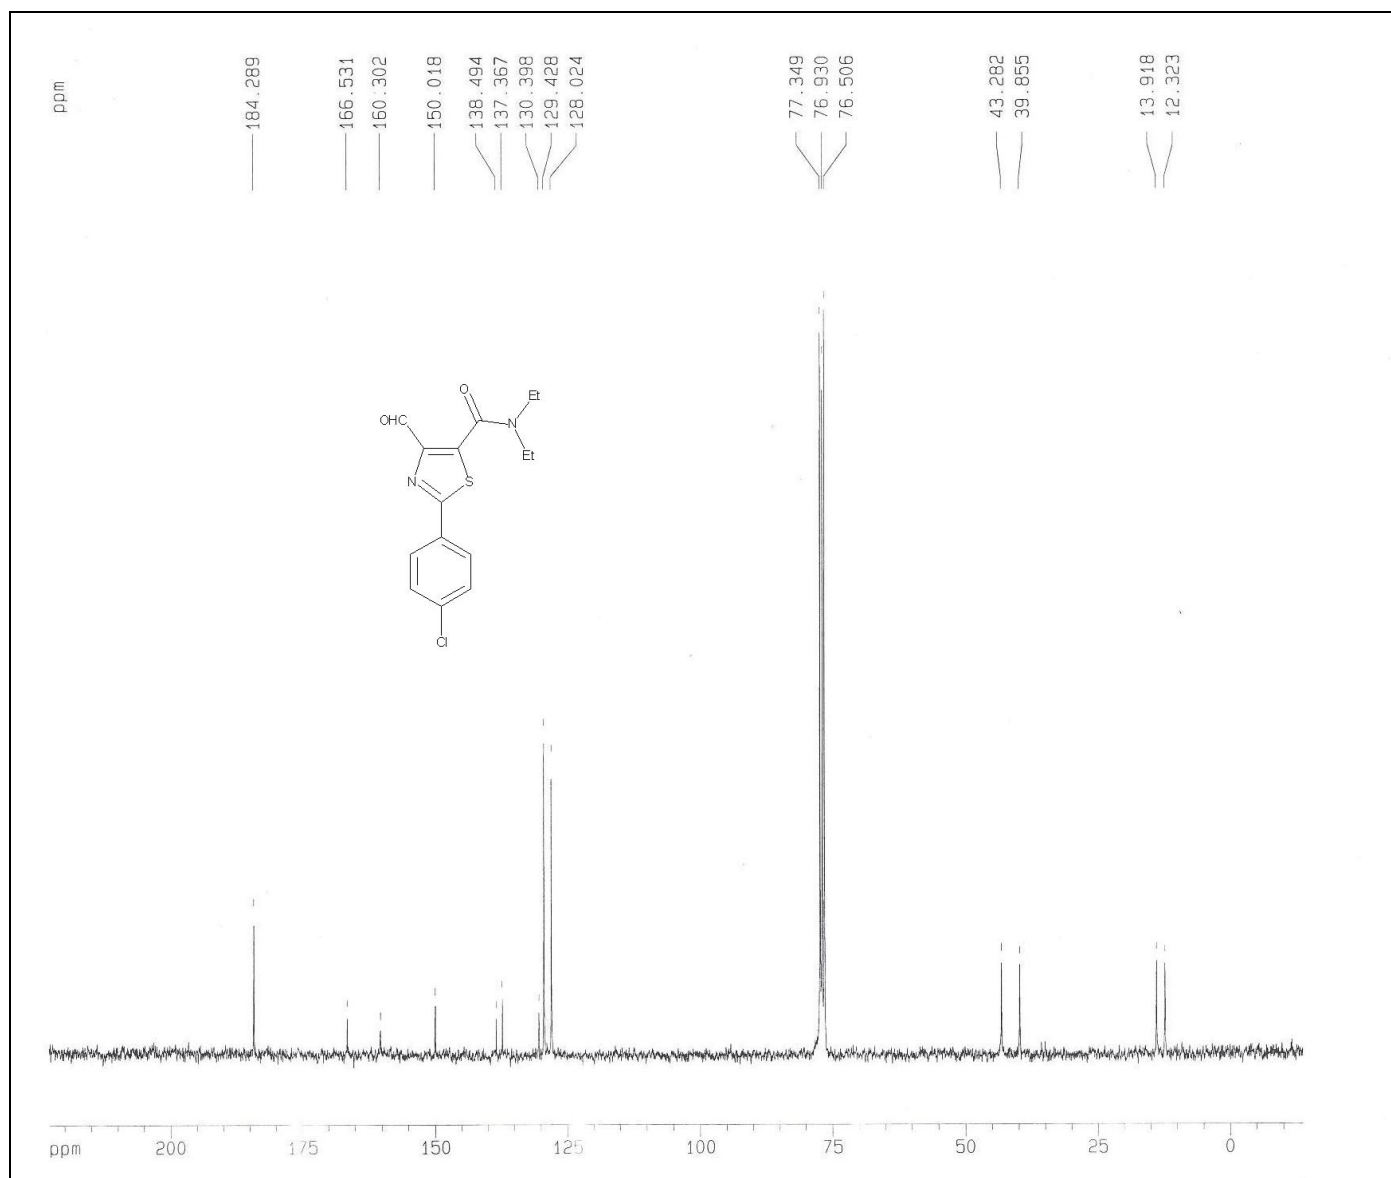

<sup>13</sup>C NMR spectrum of compound **2i**.

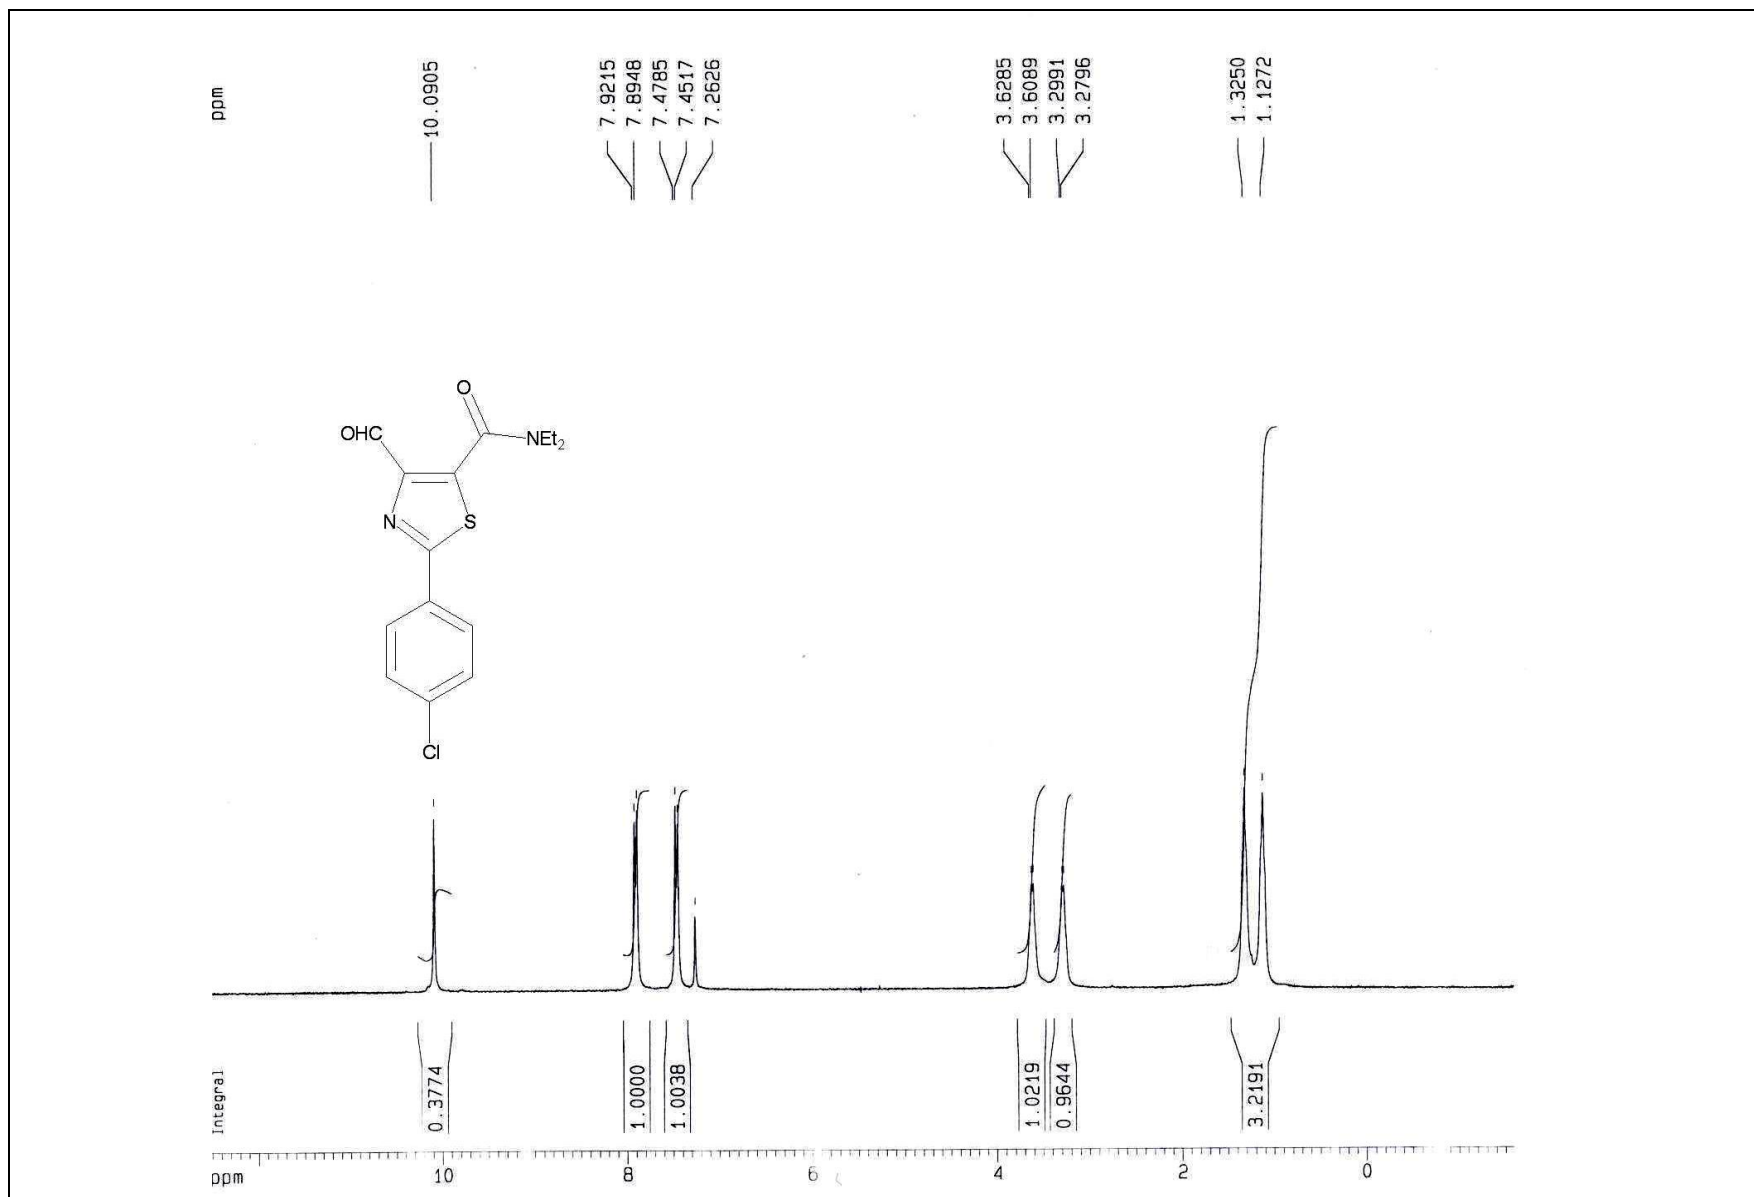

<sup>1</sup>H NMR spectrum of compound **2i**.

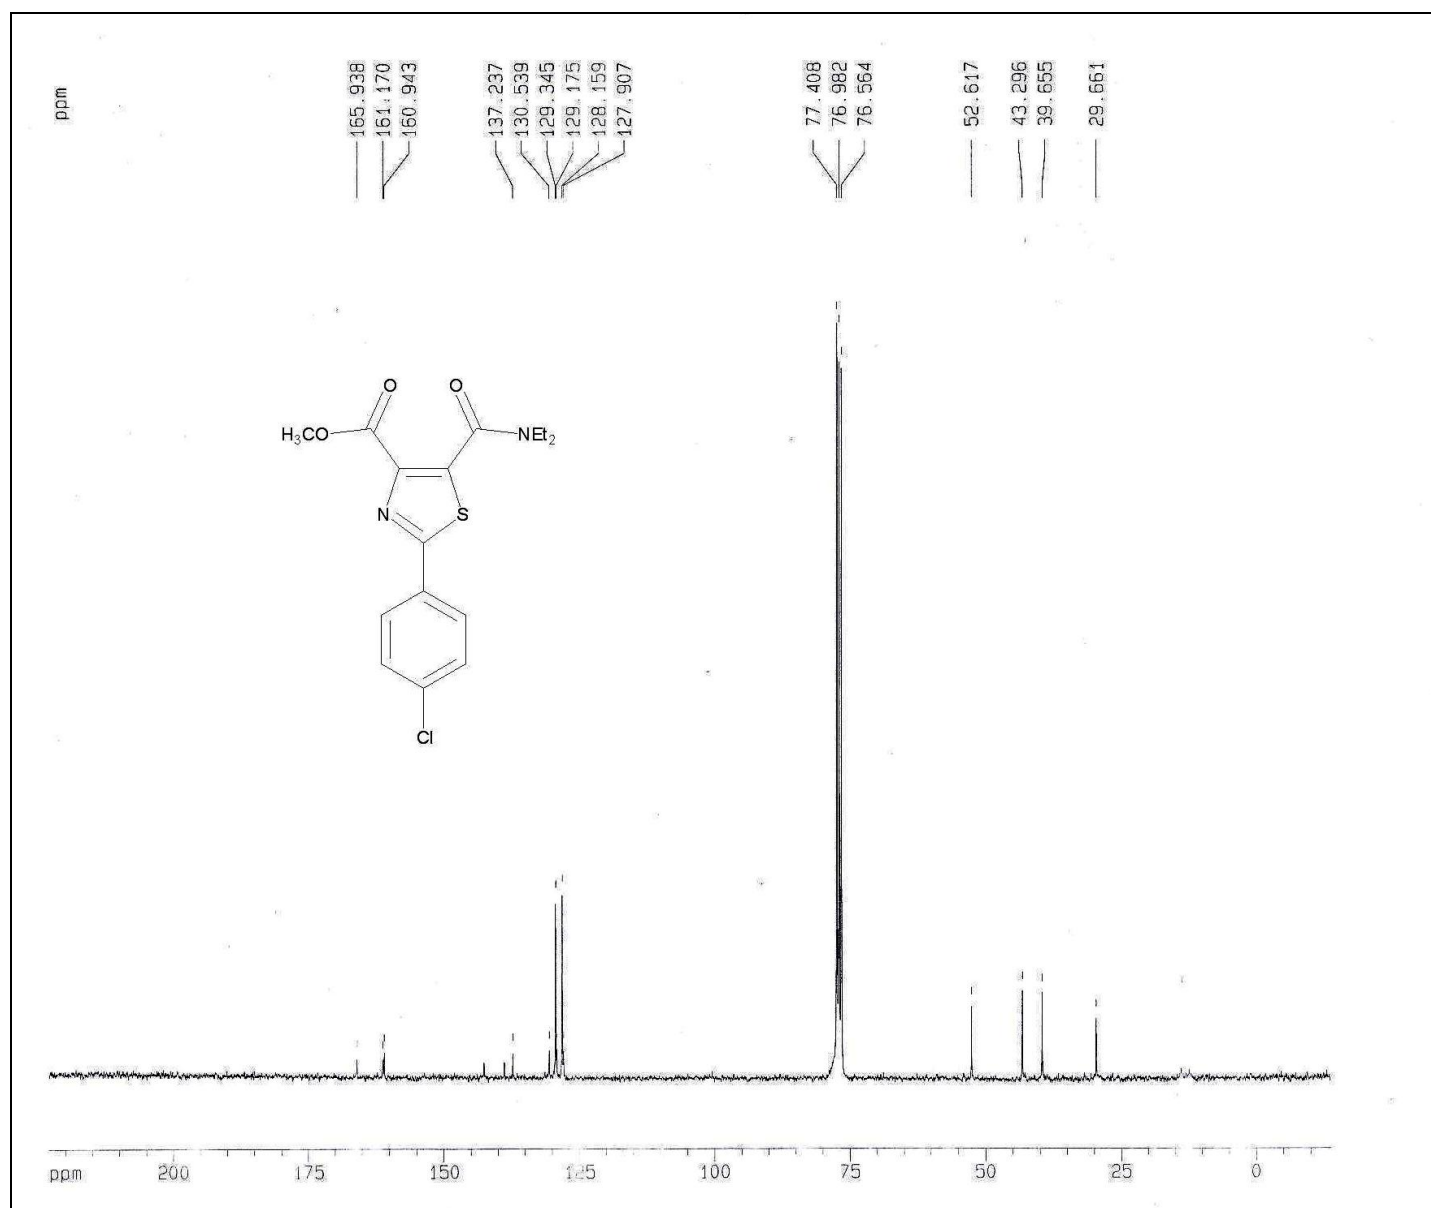

<sup>13</sup>C NMR spectrum of compound **3k**.

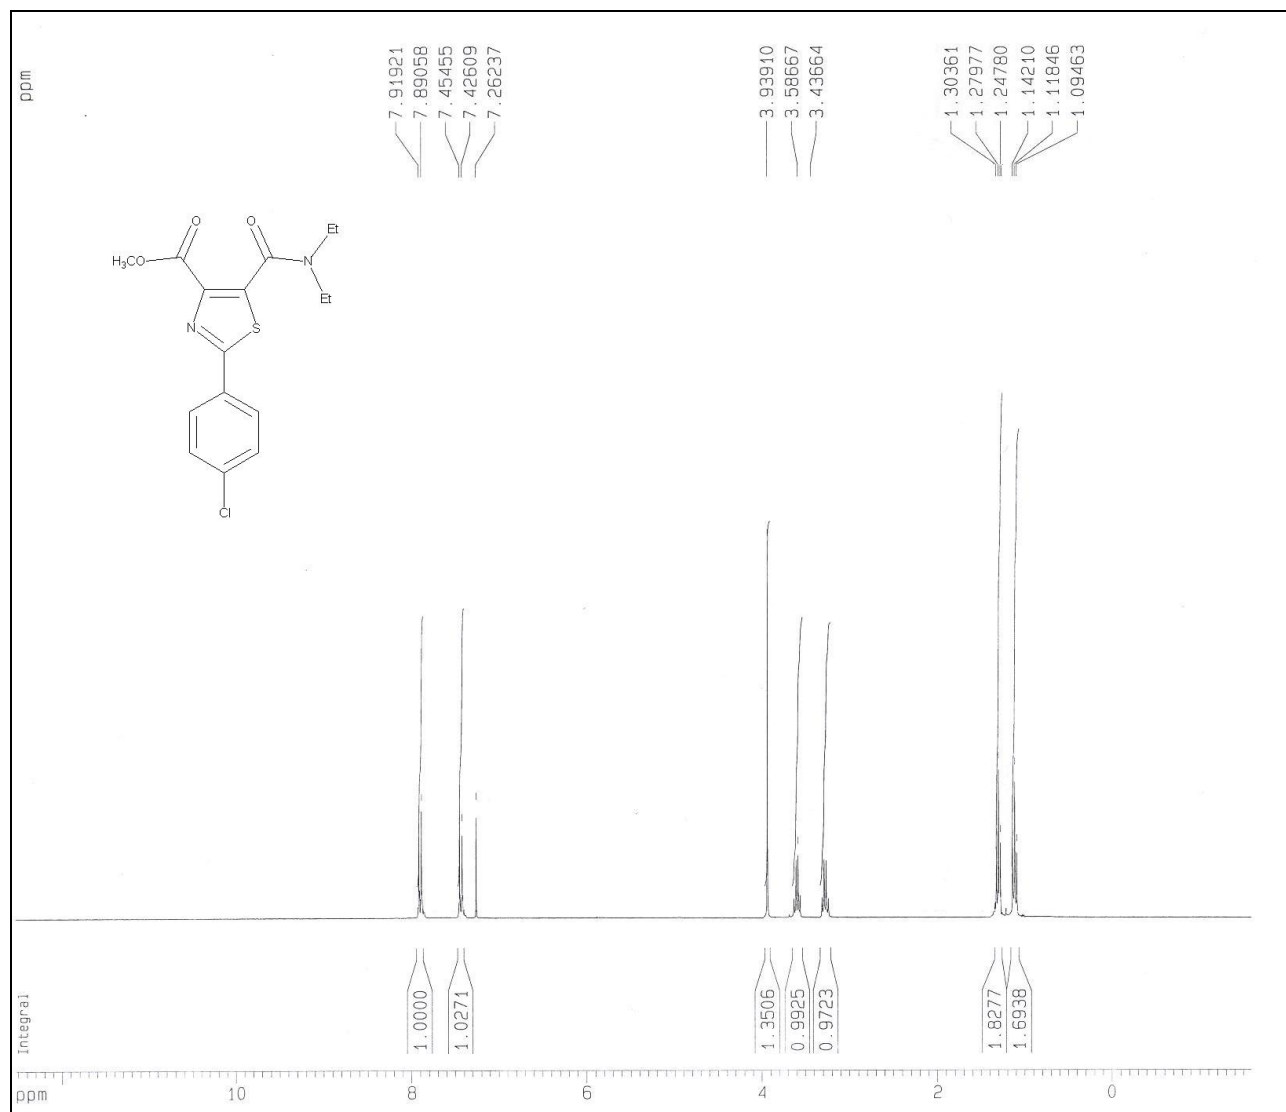

<sup>1</sup>H NMR spectrum of compound **3k**.



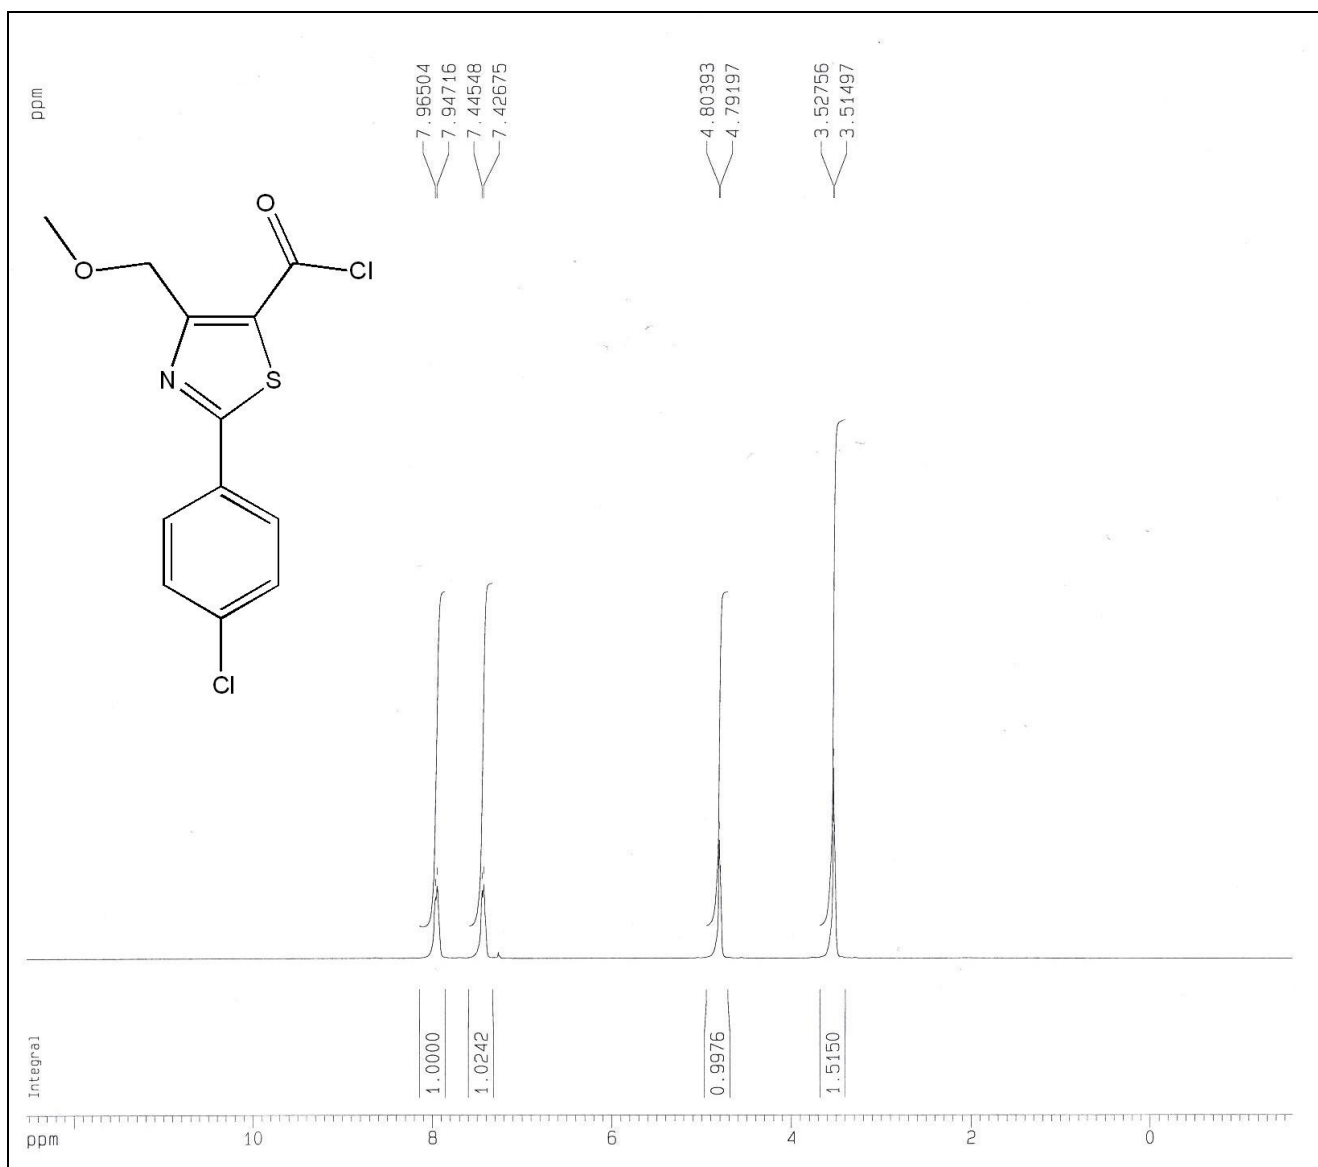

<sup>1</sup>H NMR spectrum of compound **21**.

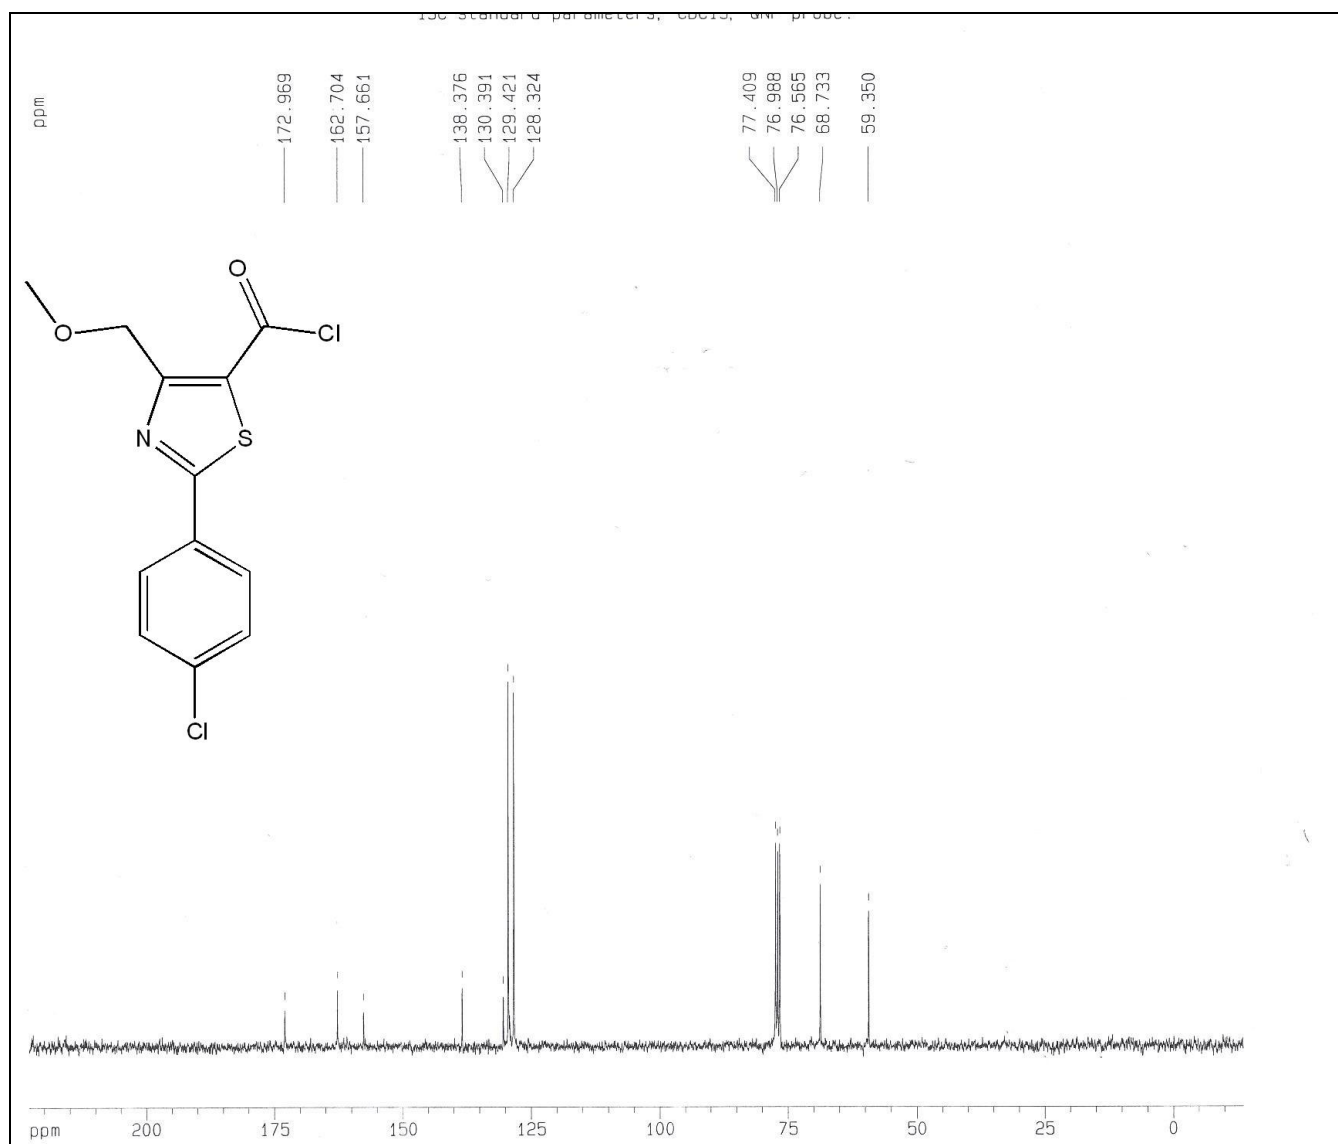

<sup>13</sup>C NMR spectrum of compound **21**.

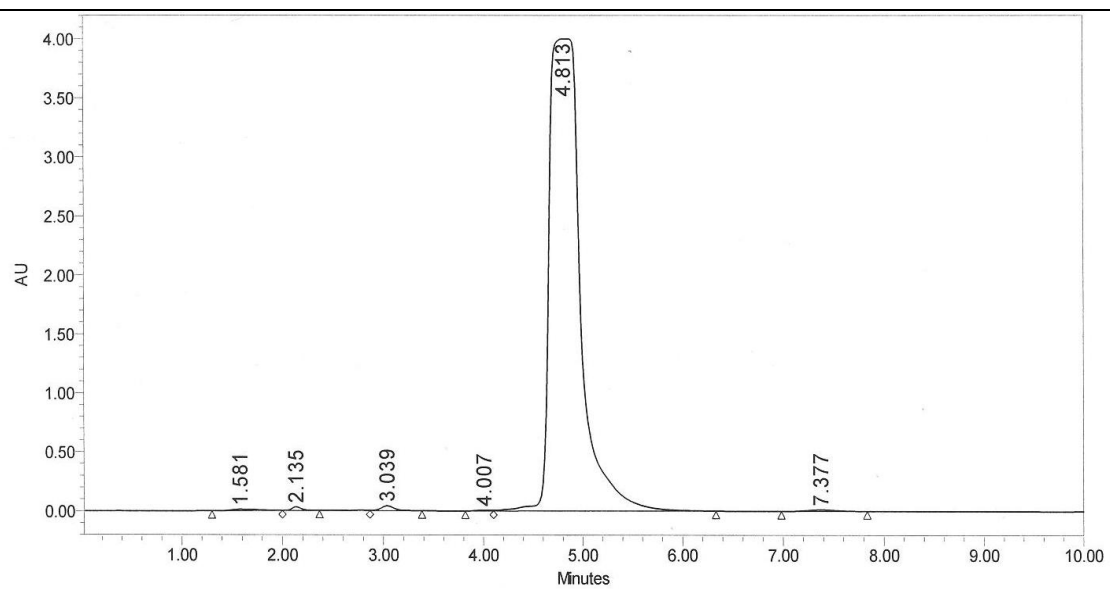

|   | RT (min) | Area ( $\mu\text{V}\cdot\text{sec}$ ) | % Area | Height ( $\mu\text{V}$ ) | % Height |
|---|----------|---------------------------------------|--------|--------------------------|----------|
| 1 | 1.581    | 222580                                | 0.25   | 12369                    | 0.30     |
| 2 | 2.135    | 205804                                | 0.23   | 32247                    | 0.79     |
| 3 | 3.039    | 350562                                | 0.40   | 40542                    | 0.99     |
| 4 | 4.007    | 78098                                 | 0.09   | 7274                     | 0.18     |
| 5 | 4.813    | 87238441                              | 98.75  | 3999304                  | 97.43    |
| 6 | 7.377    | 244874                                | 0.28   | 12927                    | 0.31     |

HPLC Chart of compound **2h**.

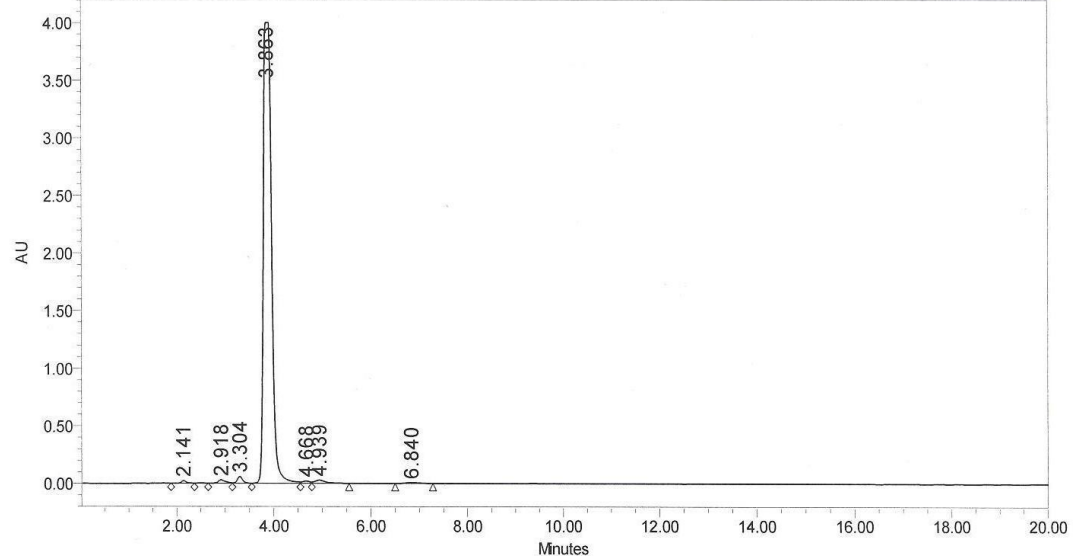

|   | RT (min) | Area (μV*sec) | % Area | Height (μV) | % Height |
|---|----------|---------------|--------|-------------|----------|
| 1 | 2.141    | 184166        | 0.38   | 23707       | 0.56     |
| 2 | 2.918    | 329590        | 0.68   | 31280       | 0.73     |
| 3 | 3.304    | 450754        | 0.93   | 58816       | 1.38     |
| 4 | 3.863    | 46602769      | 96.38  | 4102647     | 96.05    |
| 5 | 4.668    | 211369        | 0.44   | 20158       | 0.47     |
| 6 | 4.939    | 429006        | 0.89   | 27432       | 0.64     |
| 7 | 6.840    | 143920        | 0.30   | 7122        | 0.17     |

HPLC Chart of 3k.

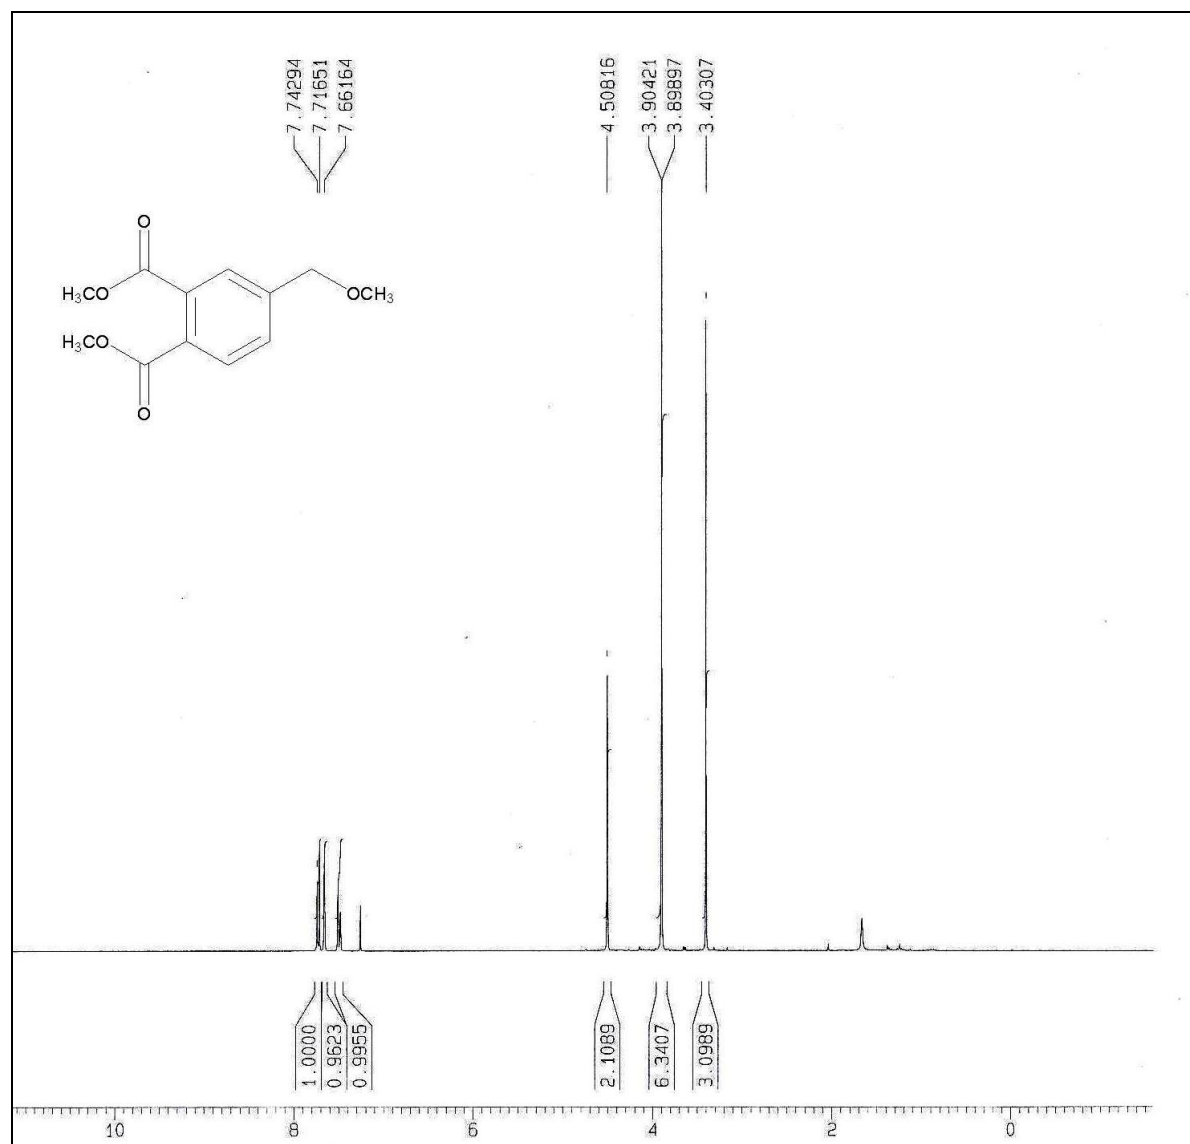

<sup>1</sup>H NMR spectrum of compound **1h**.

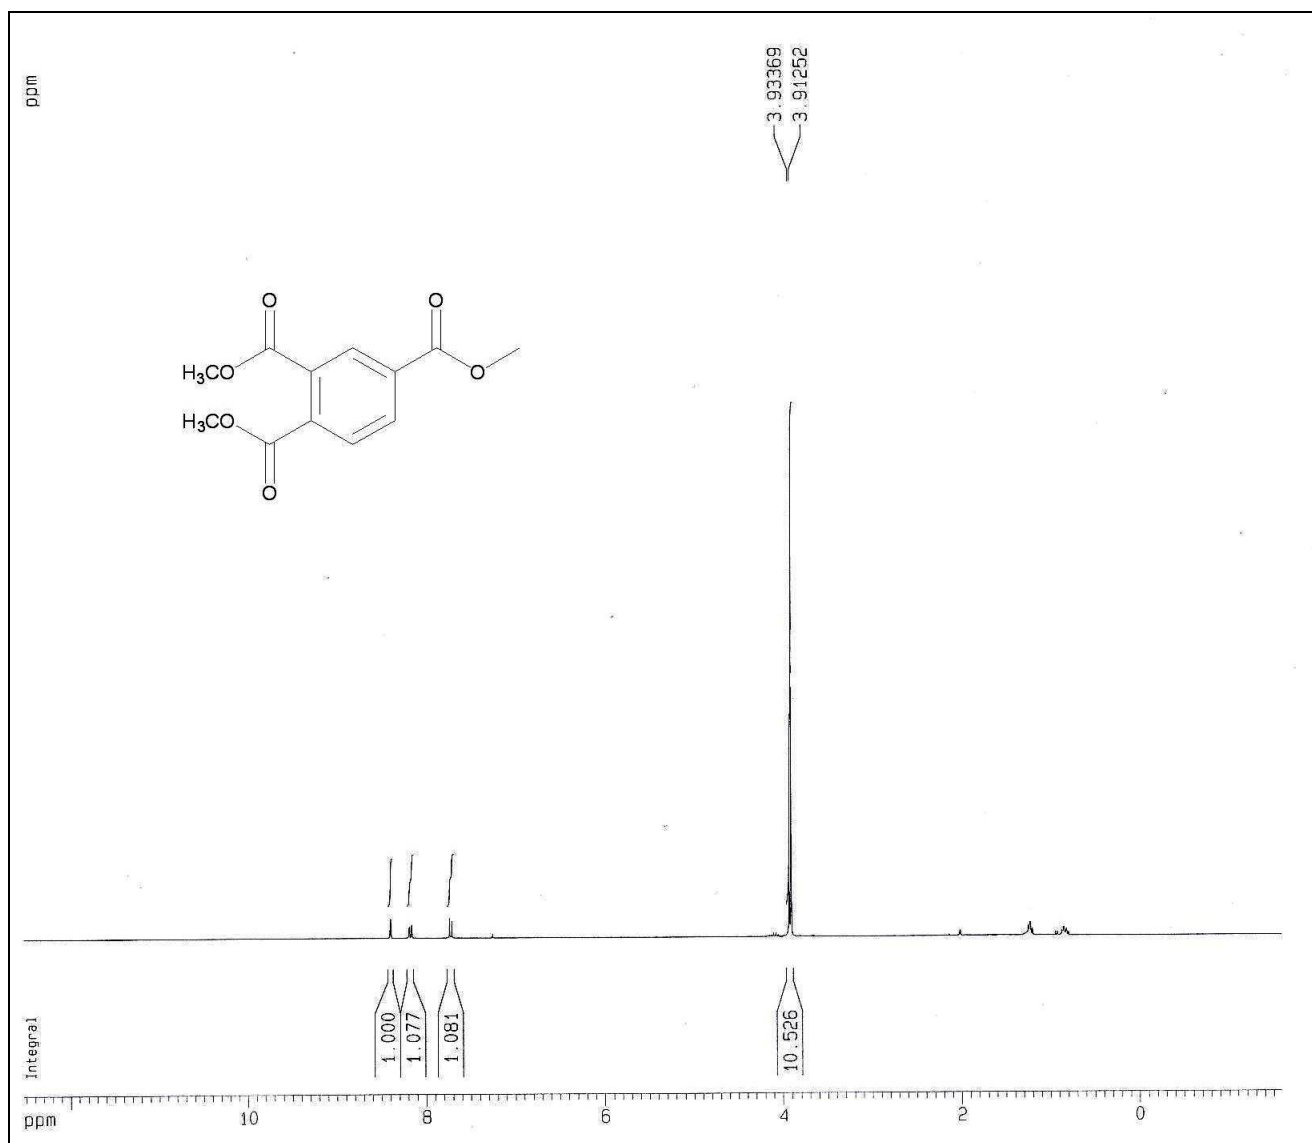

<sup>1</sup>H NMR spectrum of compound **3g**.

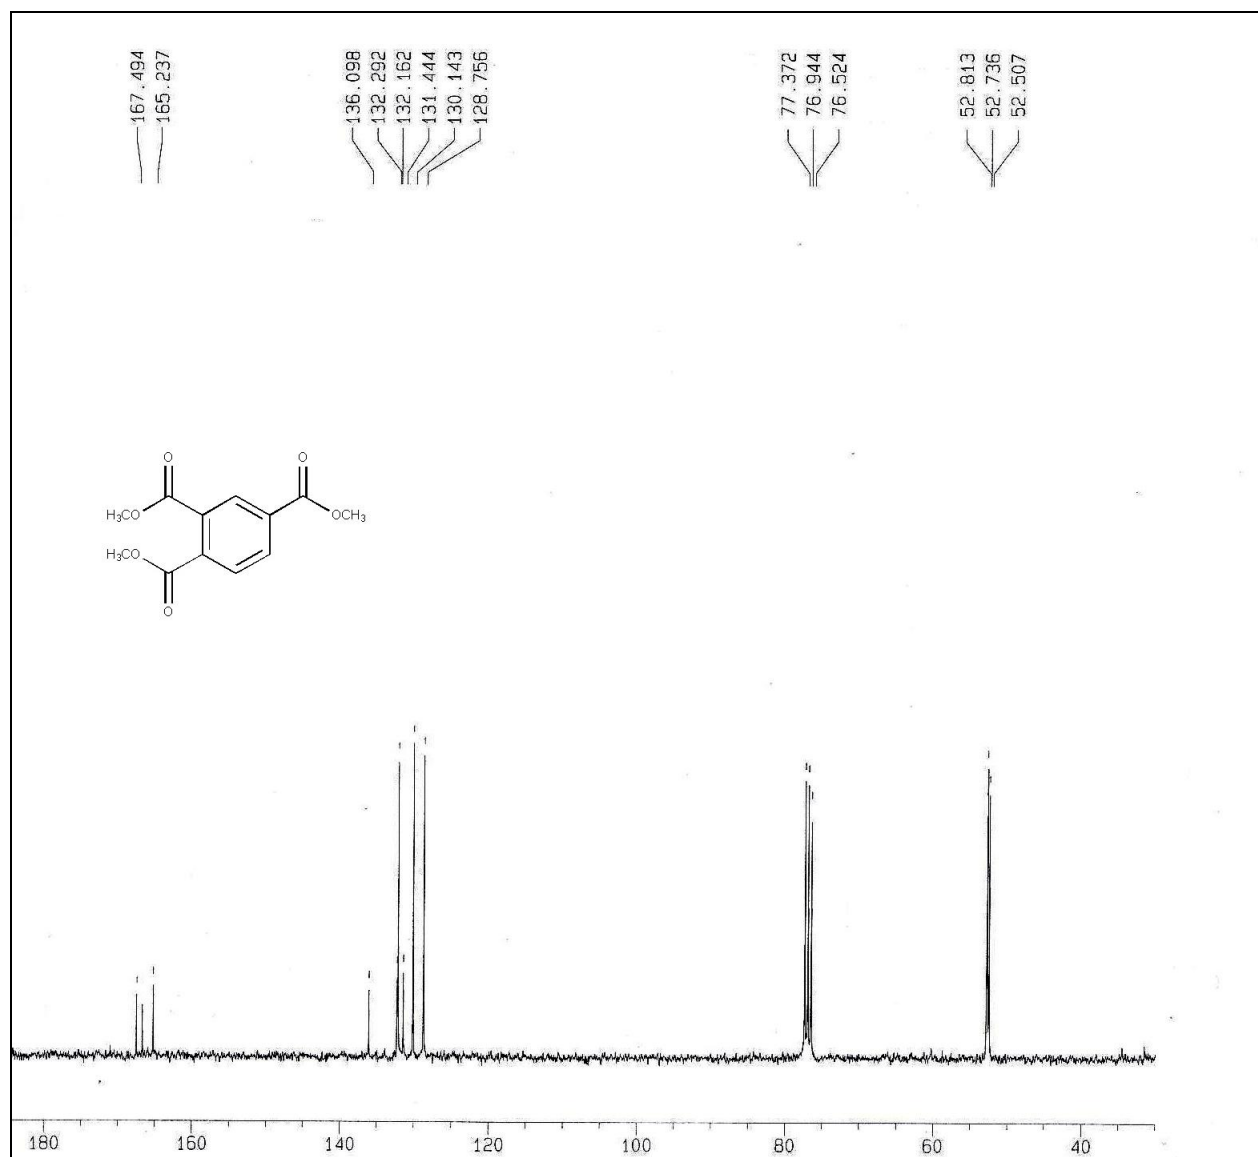

<sup>13</sup>C NMR spectrum of compound **3g**.

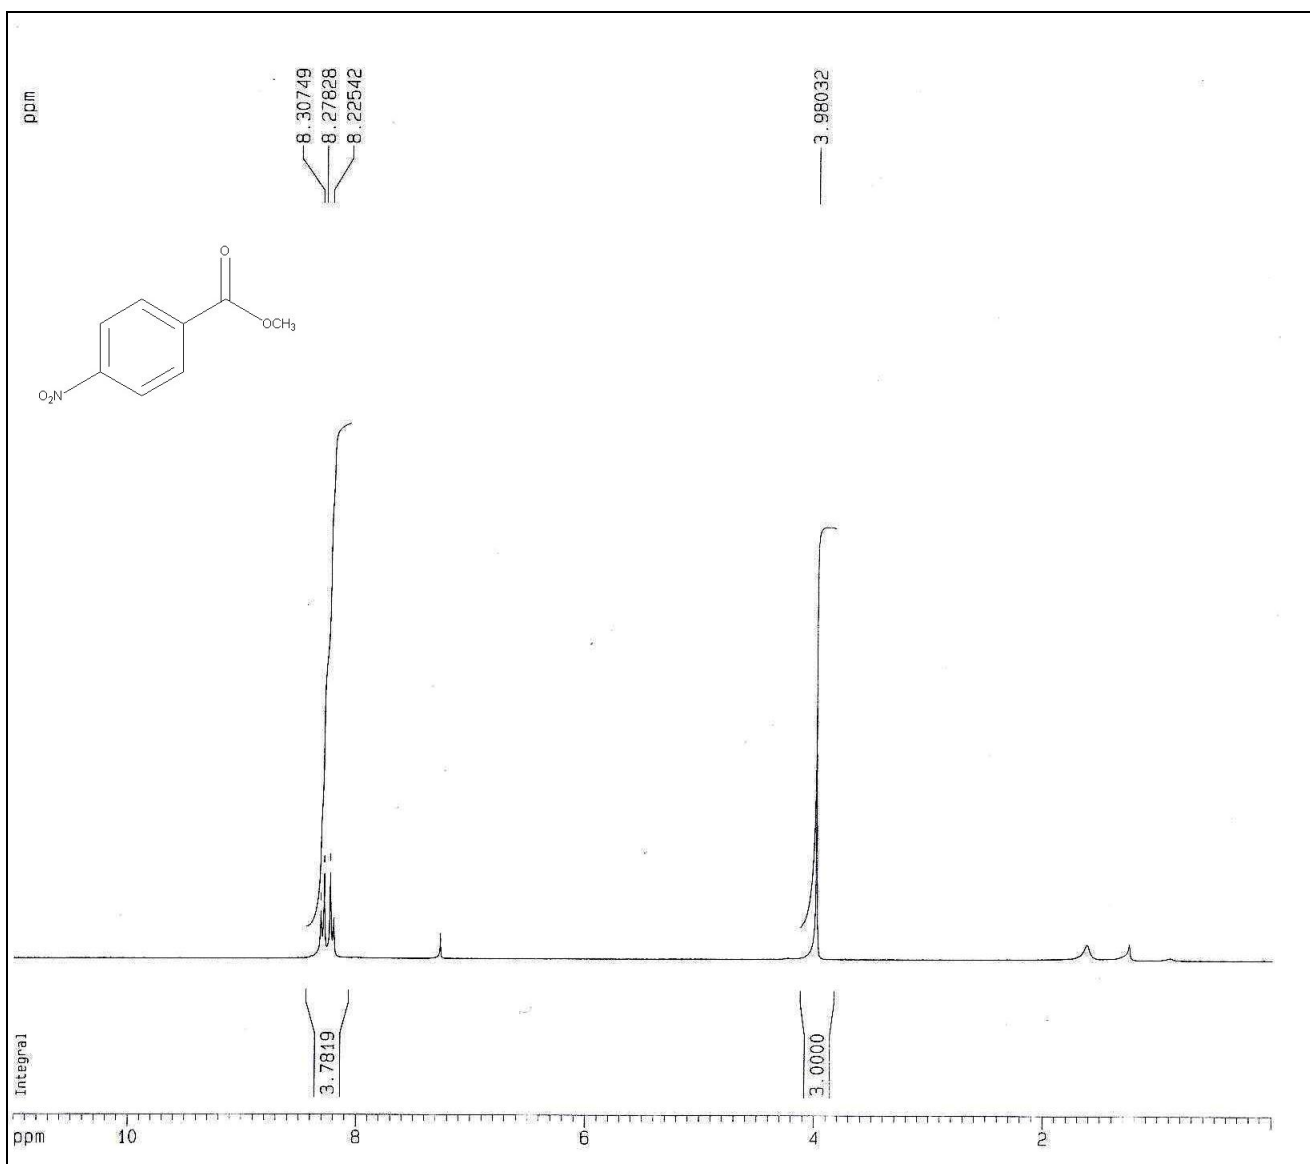

$^1\text{H}$  NMR spectrum of methyl 4-nitrobenzoate **3f**.



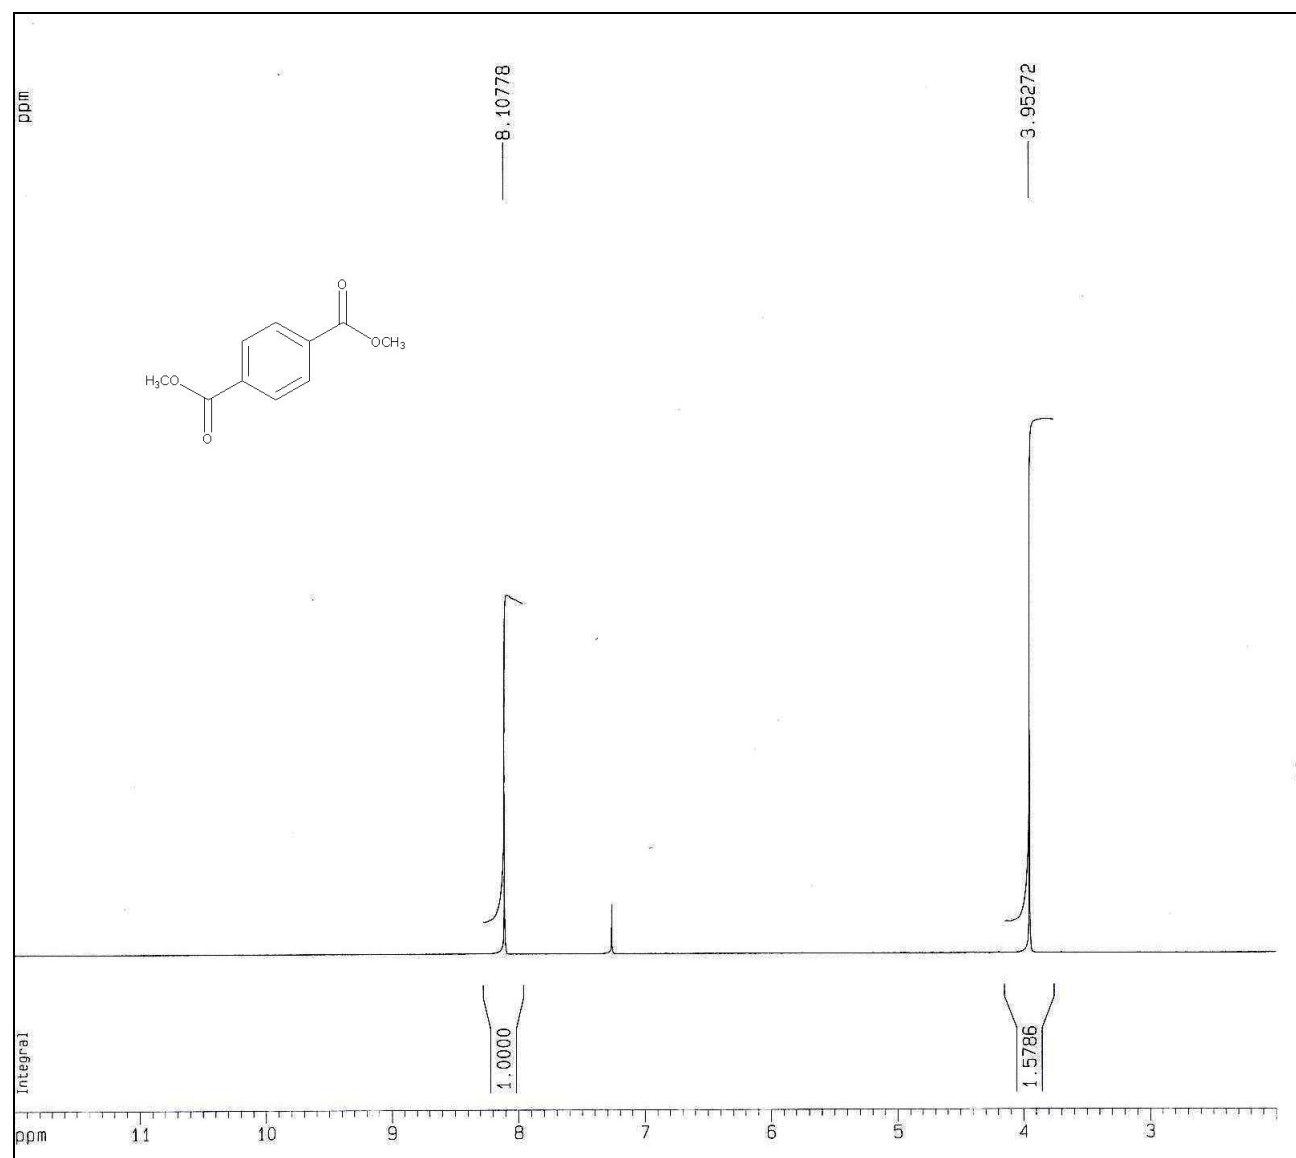

$^1\text{H}$  NMR spectrum of dimethyl terephthalate **3e**.

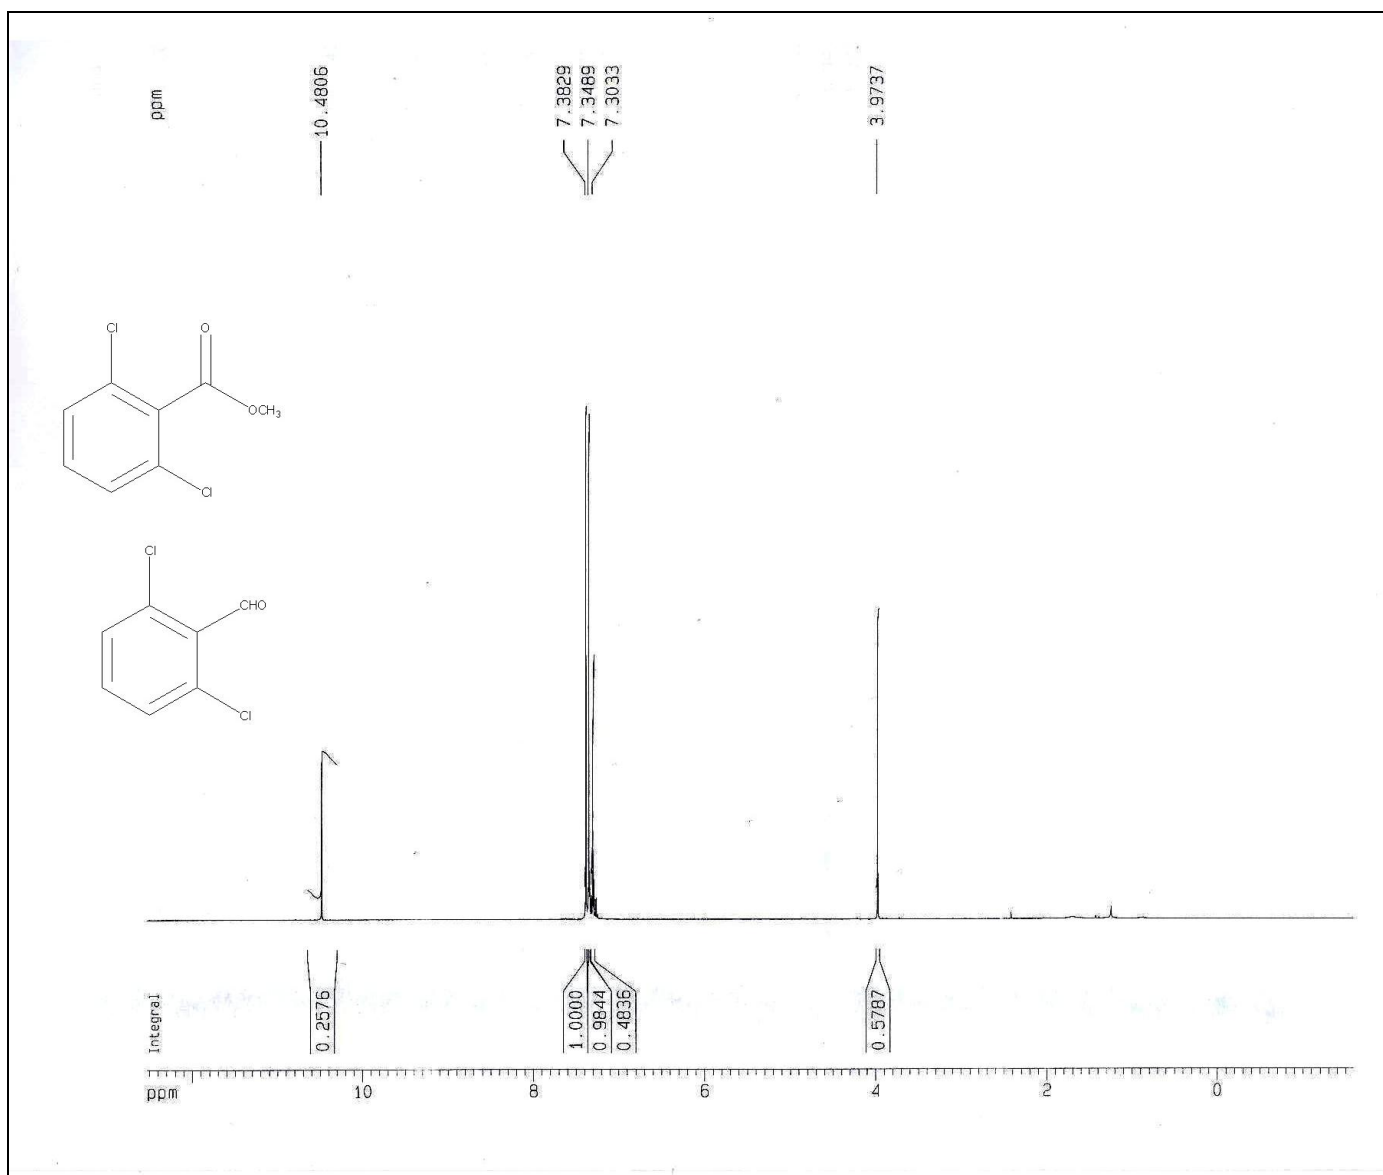

<sup>1</sup>H NMR spectrum of entry 5.

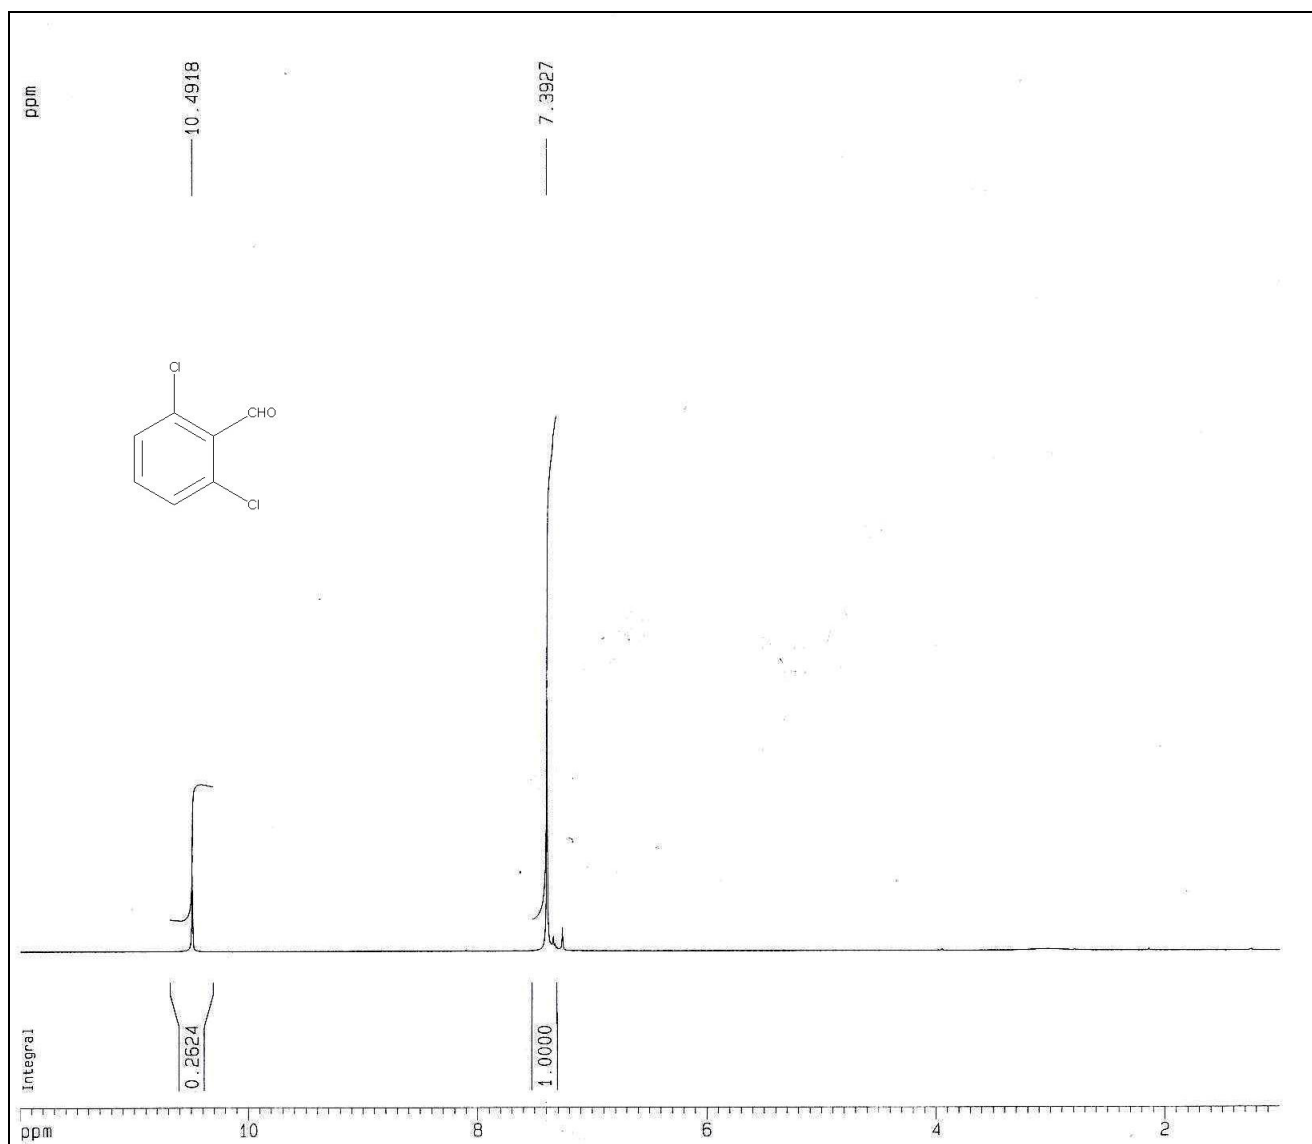

$^1\text{H}$  NMR spectrum of 2,6-dichlorobenzaldehyde (**2b**).

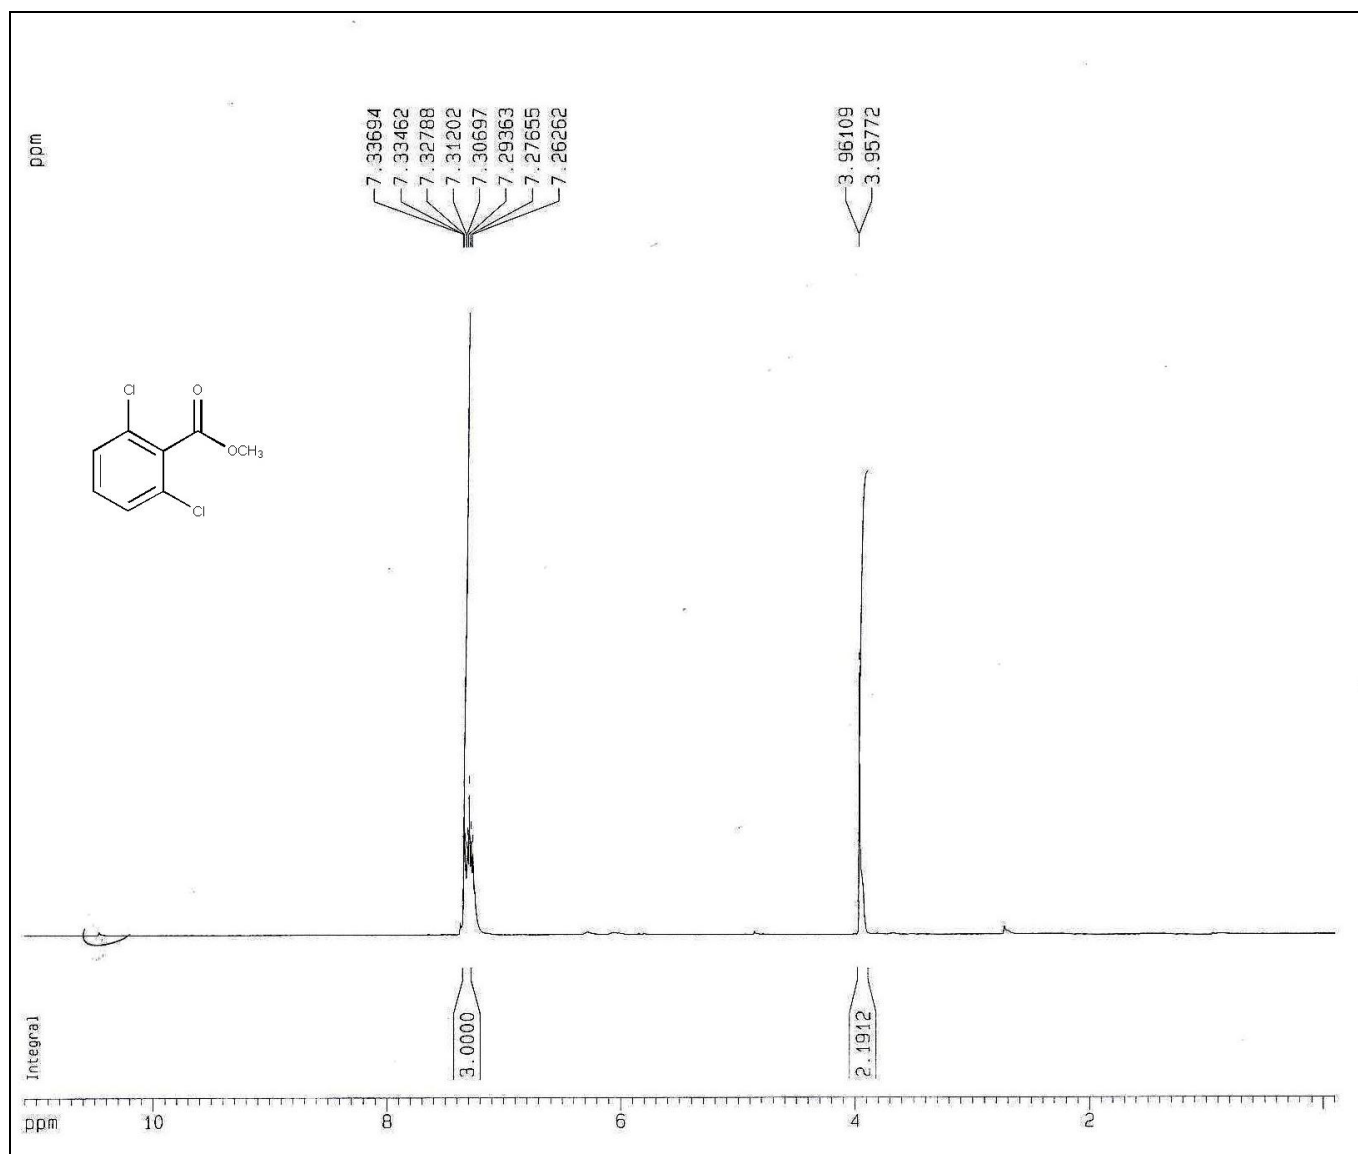

<sup>1</sup>H NMR spectrum of methyl 2,6-dichlorobenzoate (**3b**).

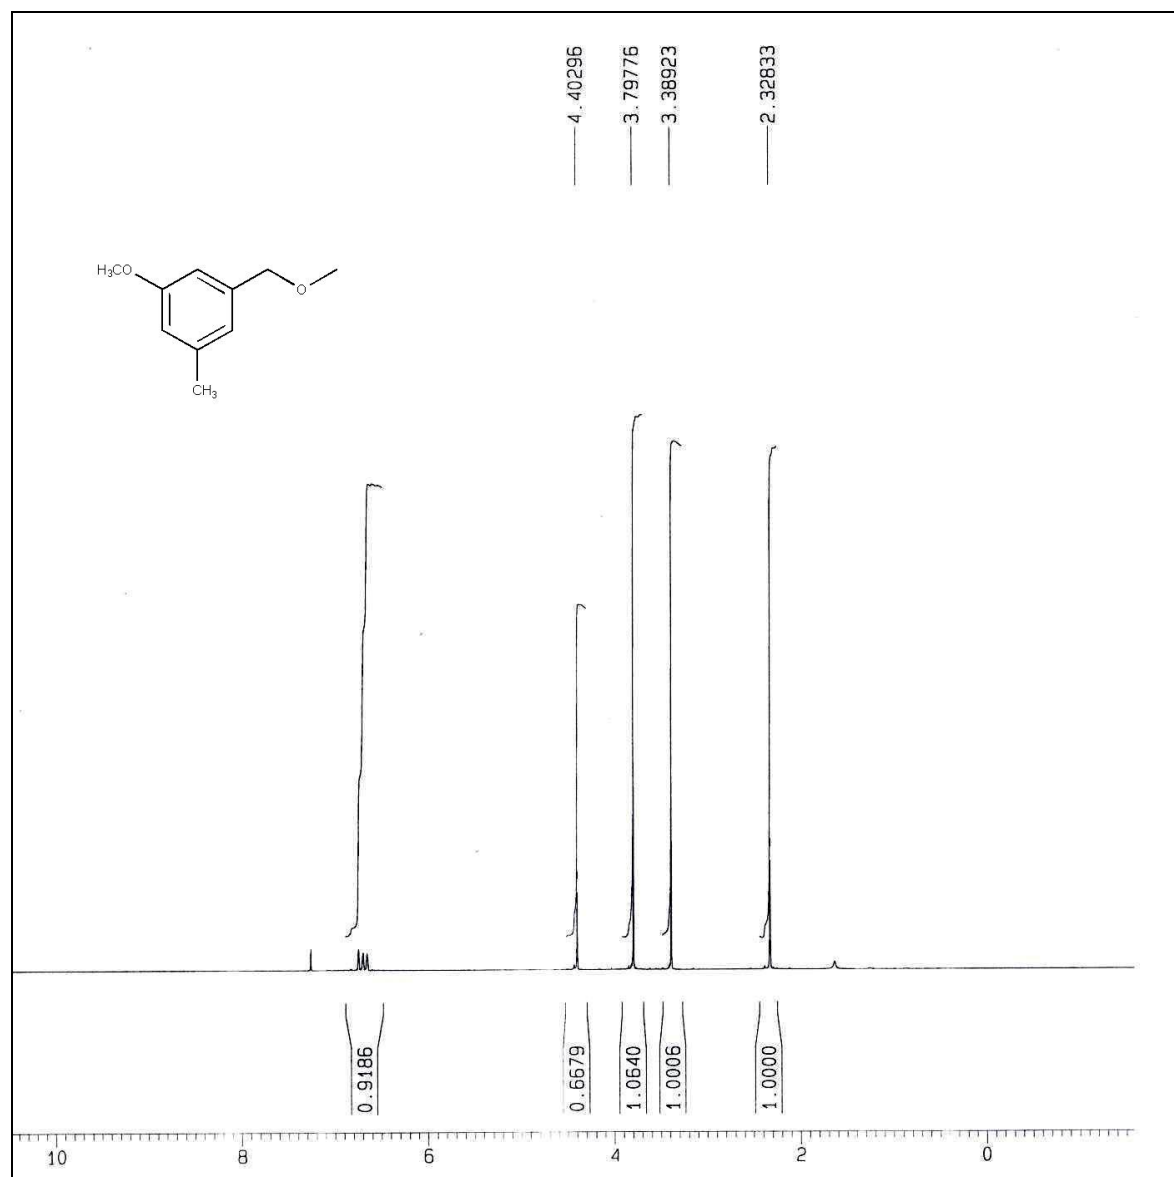

<sup>1</sup>H NMR spectrum of 1-methoxy-3-(methoxymethyl)-5-methylbenzene (**1f**).

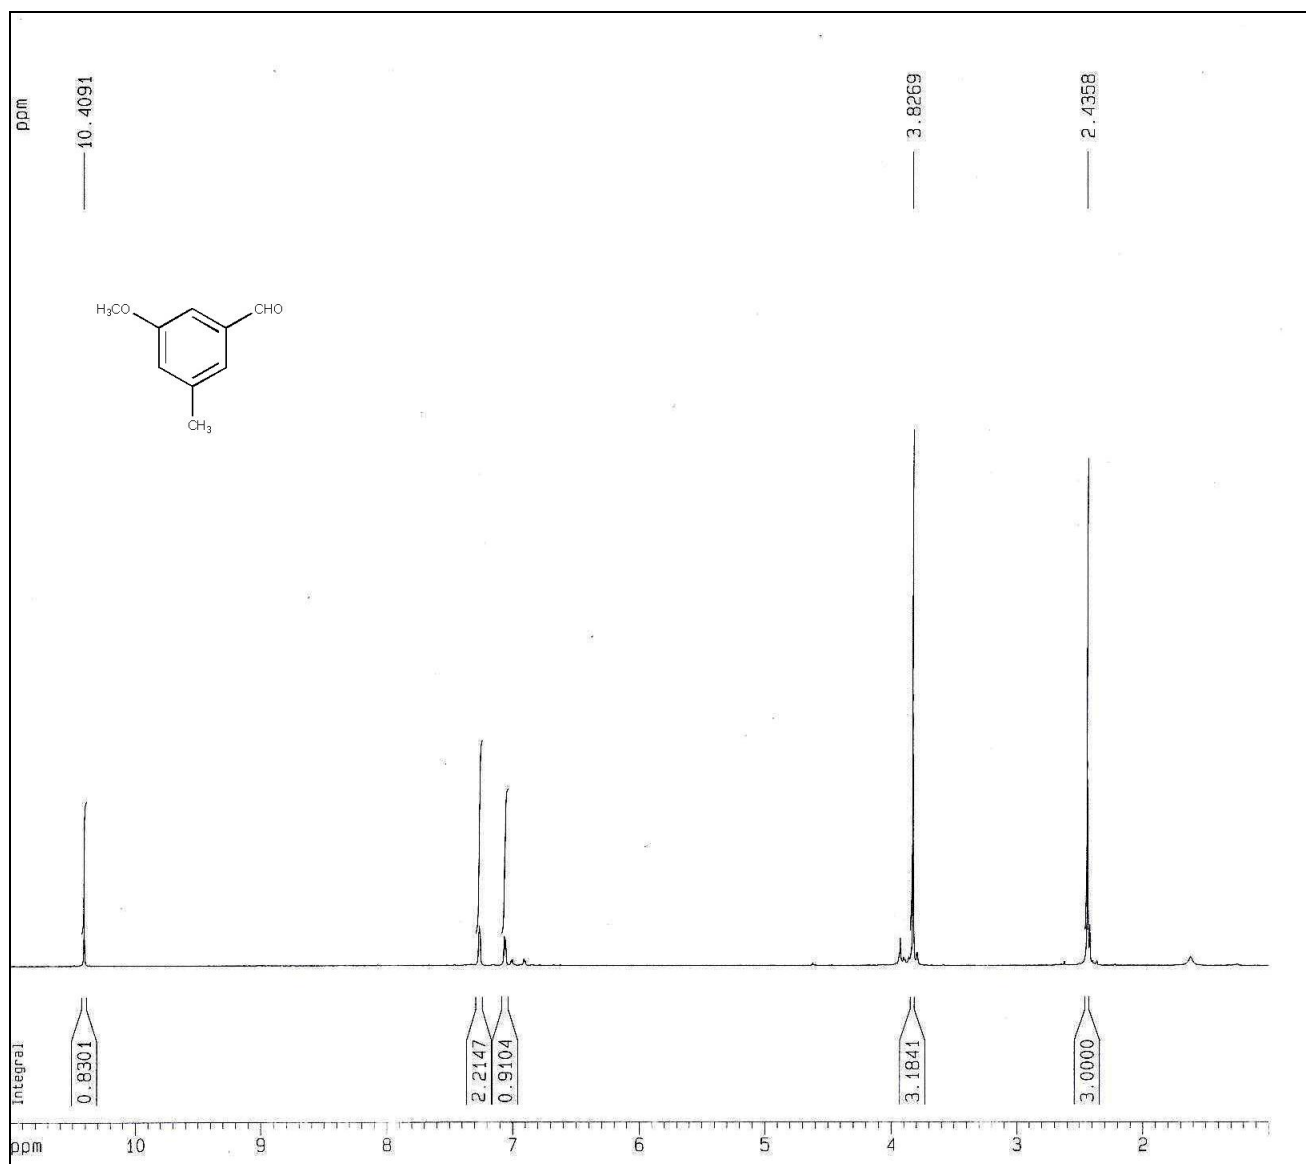

<sup>1</sup>H NMR spectrum of 3-methoxy-5-methylbenzaldehyde (**2e**).

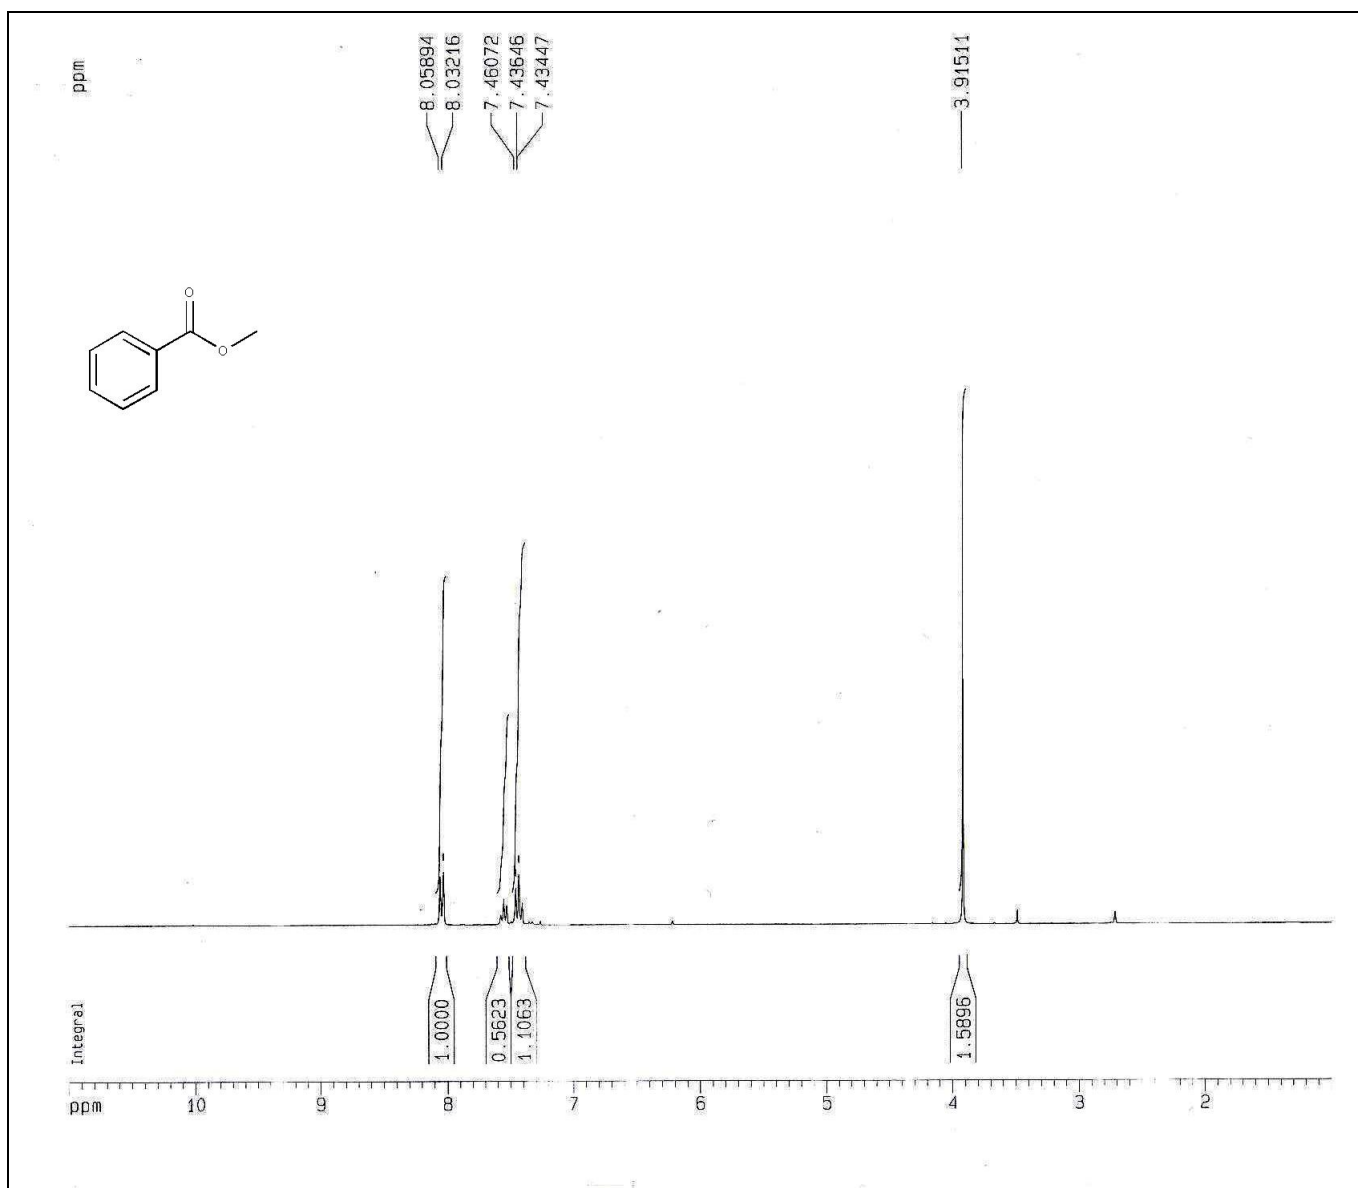

$^1\text{H}$  NMR spectrum of methyl benzoate (**3a**).

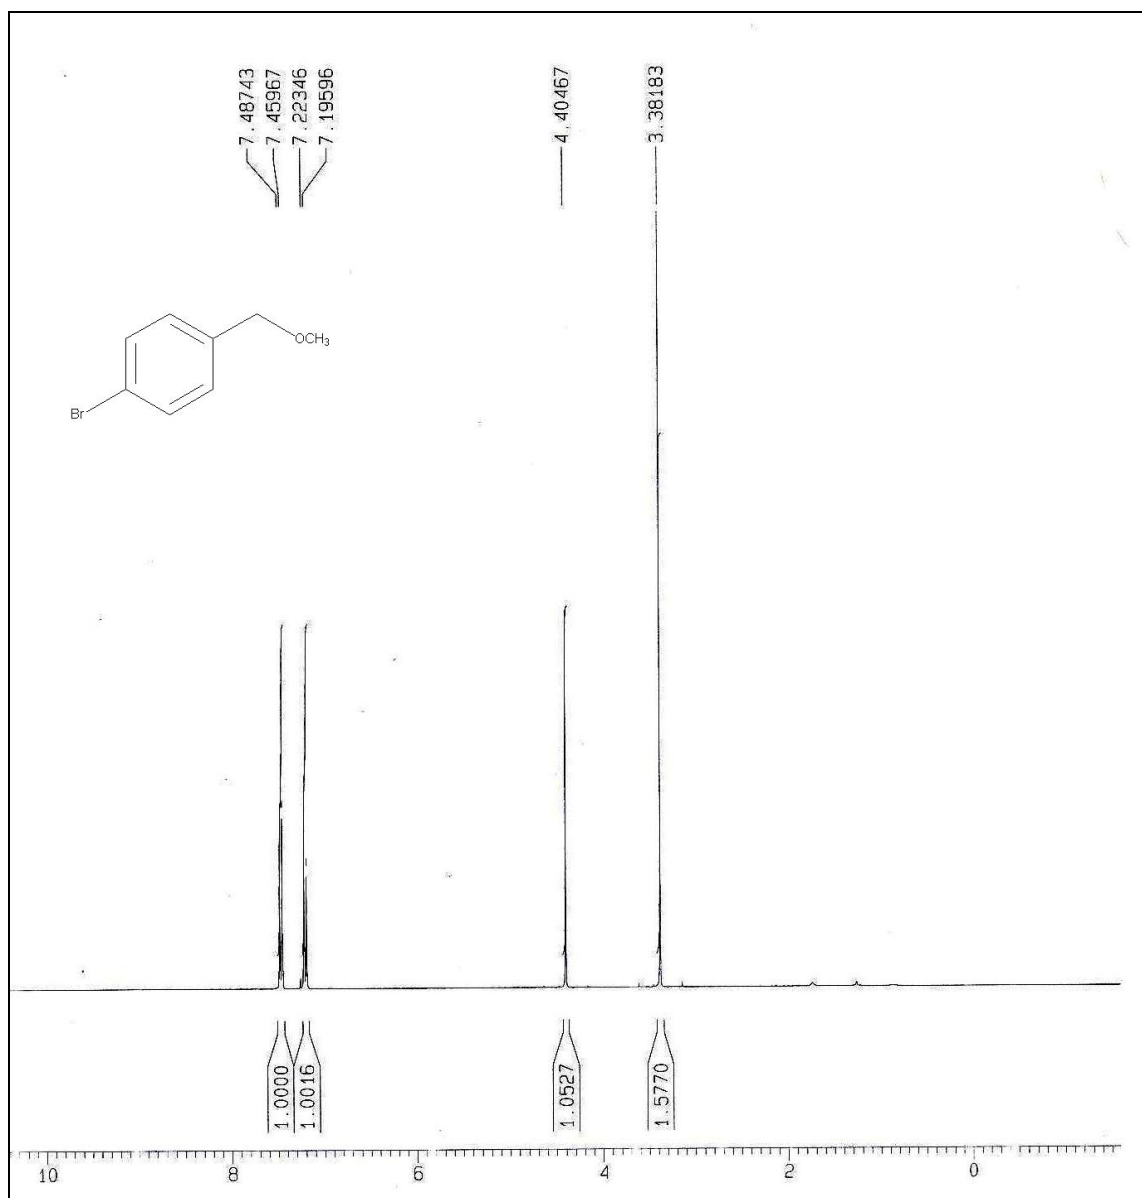

<sup>1</sup>H NMR spectrum of 1-(methoxymethyl)-4-bromobenzene (**1d**).



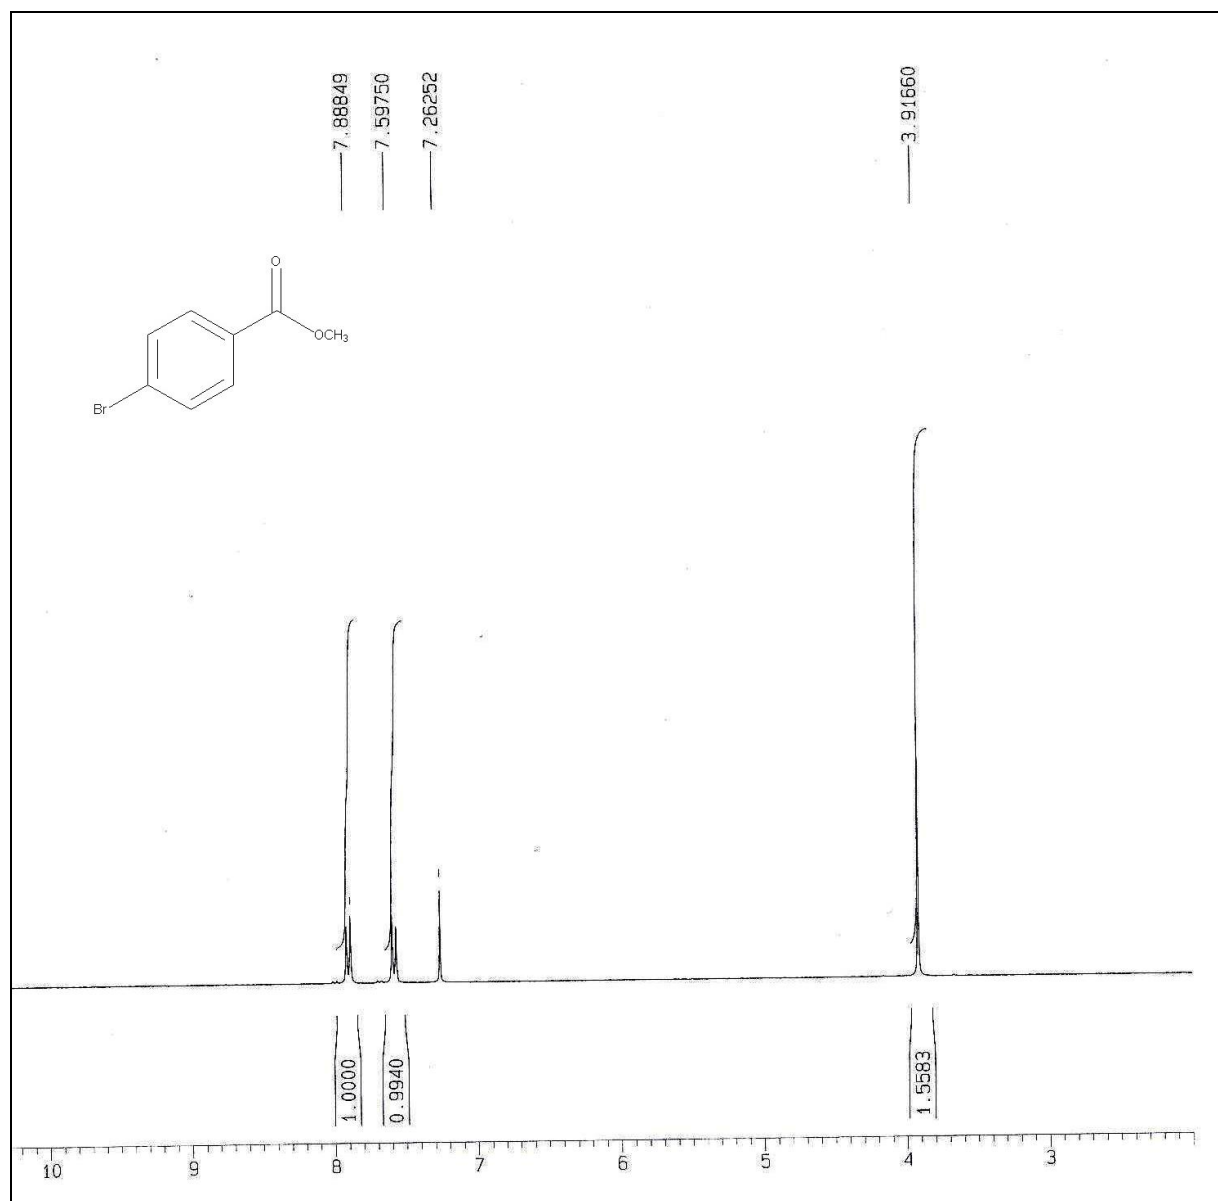

<sup>1</sup>H NMR spectrum of methyl 4-bromobenzoate (**3d**).

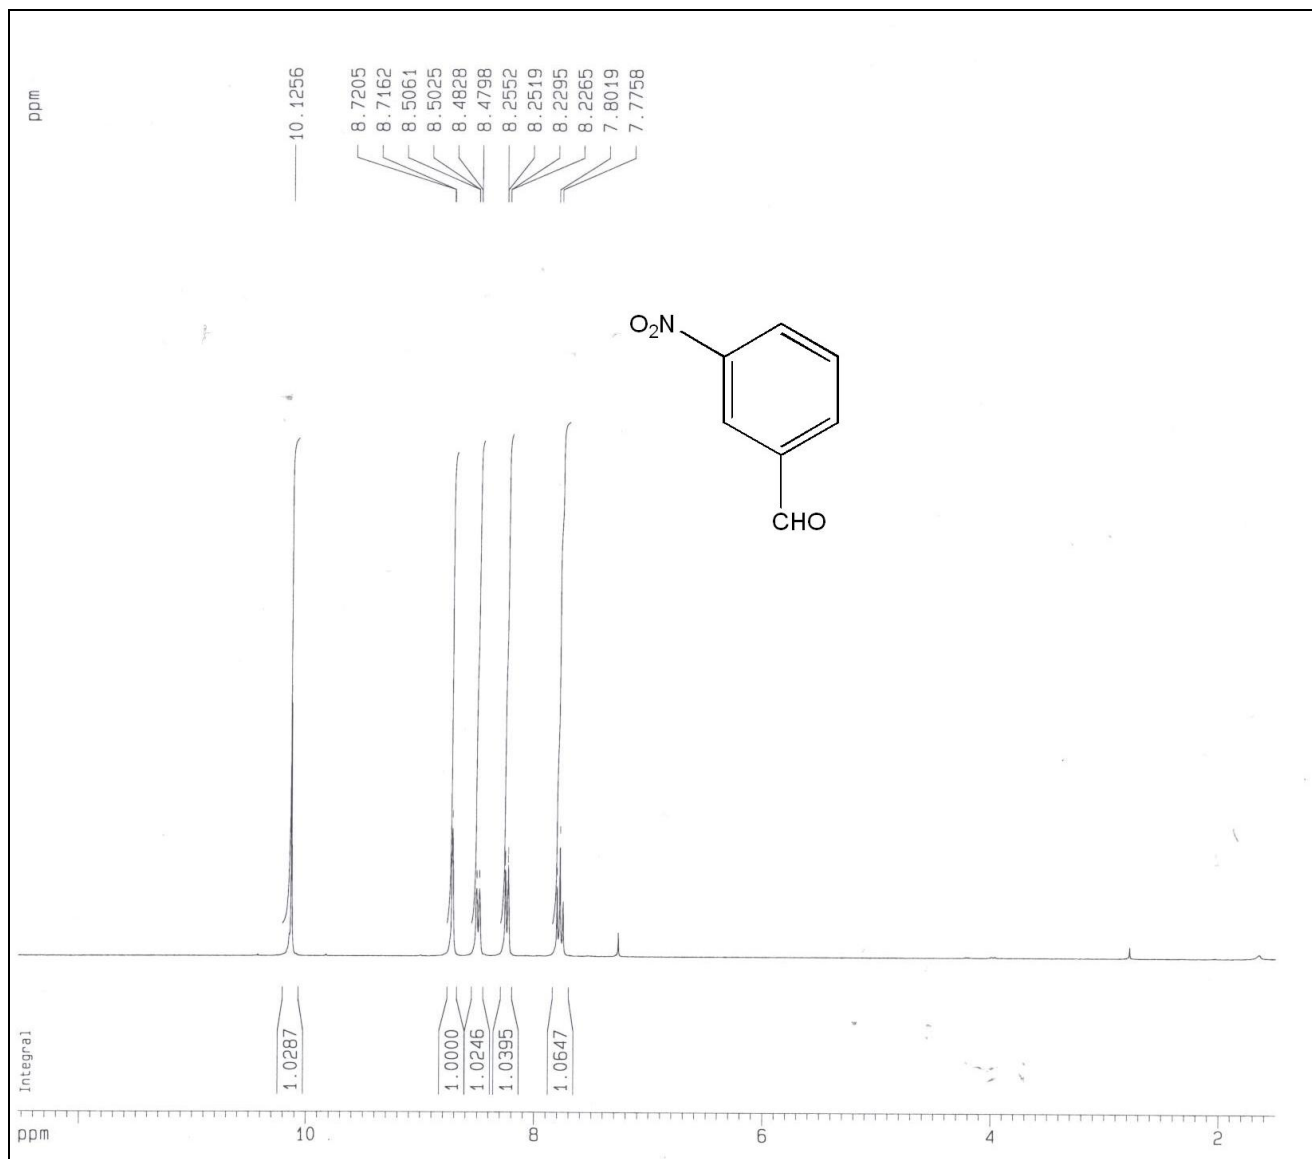

$^1\text{H}$  NMR spectrum of m-nitrobenzaldehyde (**2f**).

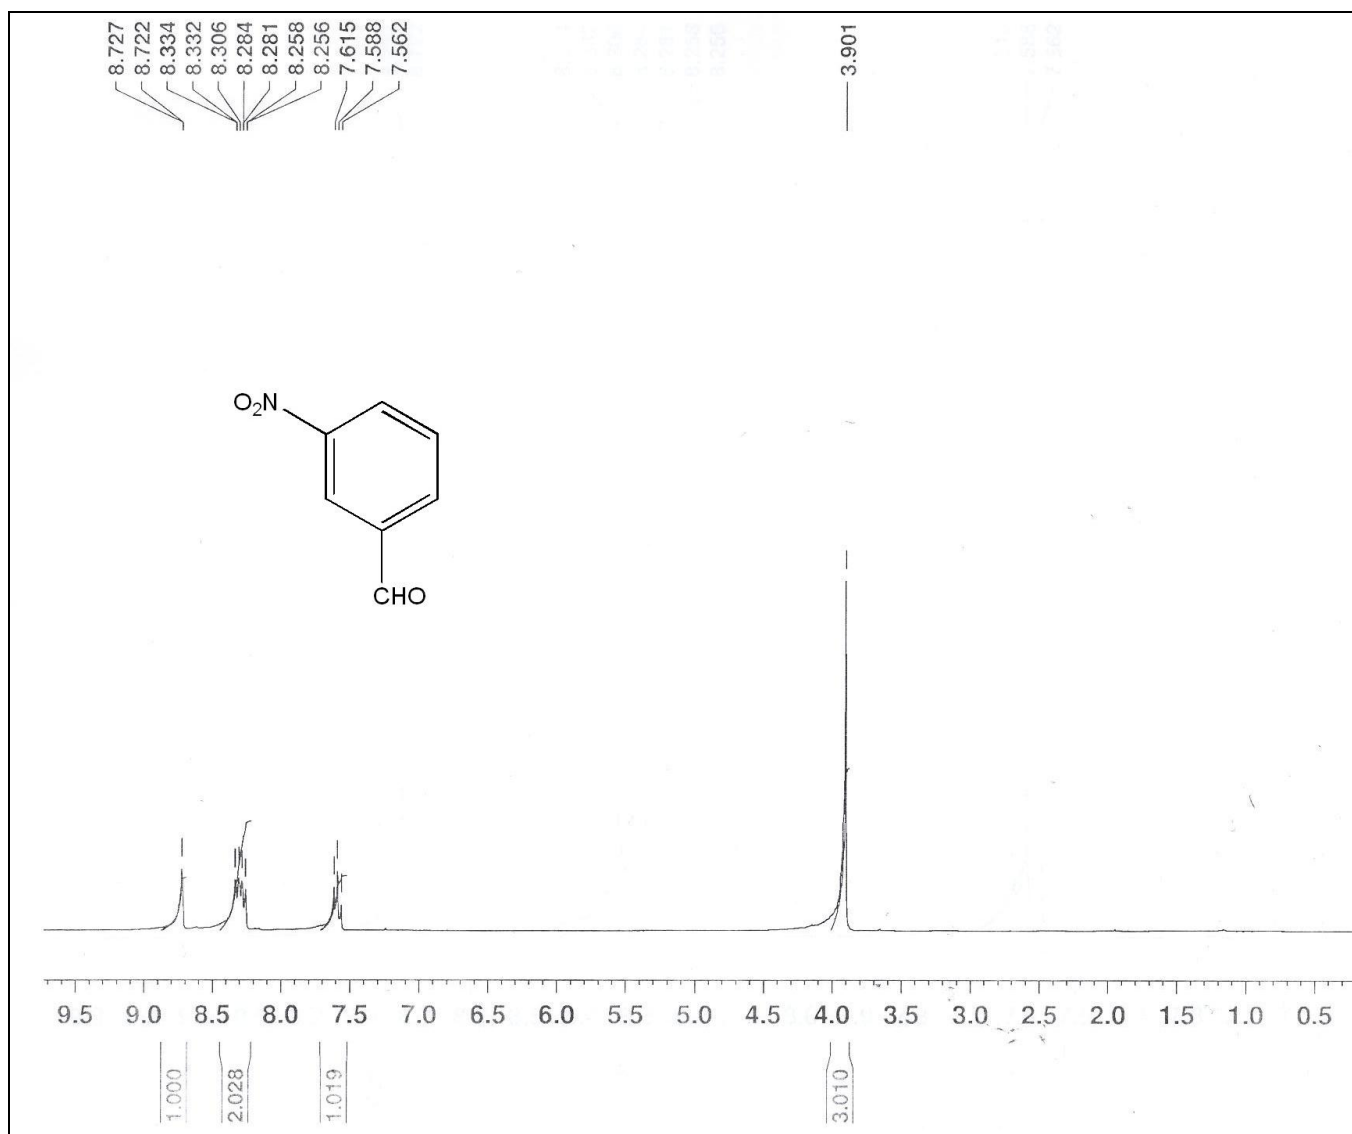

<sup>1</sup>H NMR spectrum of m-nitrobenzaldehyde (**3h**).
